# Supplementary material
Source: ML conference proceedings conference paper supplement (https://openreview.net/forum?id=dk-2R1f_LR)
Supplement: supplementary_material [file attachment]

# Appendix

## A Overview

We present several additional results in the Appendix.

- **FAQ** (Appendix B): answers to some common questions
- **Limitations** (Appendix C): more thorough list and discussion of MimicGen limitations
- **Related Work** (Appendix D): discussion on related work
- **Robot Transfer** (Appendix E): full set of results for generating data across robot arms
- **Object Transfer** (Appendix F): full set of results for generating data across objects
- **Real Robot Results** (Appendix G): additional details and discussion on the real robot experiments, including an explanation for the lower training results in the real world
- **Different Demonstrators** (Appendix H): results that show MimicGen works just as well when using source demos from suboptimal demonstrators and from different teleoperation devices
- **Motivation for MimicGen over Alternative Methods** (Appendix I): motivation for MimicGen over offline data augmentation and replay-based imitation
- **Additional Details on Object-Centric Subtasks** (Appendix J): more details and intuition on subtasks, including examples
- **Tasks and Task Variants** (Appendix K): detailed descriptions all tasks and task variants
- **Derivation of Subtask Segment Transform** (Appendix L): derivation of how MimicGen transforms subtask segments from the source data
- **Data Generation Details** (Appendix M): in-depth details on how MimicGen generates data
- **Policy Training Details** (Appendix N): details of how policies were trained from MimicGen datasets via imitation learning
- **Data Generation Success Rates** (Appendix O): data generation success rates for each of our generated datasets
- **Low-Dim Policy Training Results** (Appendix P): full results for agents trained on *low-dim* observation spaces (image agents presented in main text)
- **Bias and Artifacts in Generated Data** (Appendix Q): discussion on some undesirable properties of MimicGen data
- **Using More Varied Source Demonstrations** (Appendix R): investigation on whether having source demonstrations collected on a more varied set of task initializations is helpful
- **Data Generation with Multiple Seeds** (Appendix S): results that show there is very little variance in empirical results across different data generation seeds
- **Tolerance to Pose Estimation Error** (Appendix T): investigation of MimicGen’s tolerance to pose error

## B FAQ

### 1. What are some limitations of MimicGen?

See Appendix C for a discussion.

### 2. Why are policy learning results worse in the real world than in simulation?

See Appendix G for discussion and an additional experiment.

### 3. Since data generation relies on open-loop replay of source human data, it seems like MimicGen only works for low-precision pick-and-place tasks.

We demonstrated that MimicGen can work for a large variety of manipulation tasks and behaviors beyond standard pick-and-place tasks. This includes tasks with non-trivial contact-rich manipulation (Gear Assembly has **1mm insertion tolerance**, and Picture Frame Assembly needs **alignment of 4 holes with 4mm tolerance each**), long-horizon manipulation (up to 8 subtasks), and behaviors beyond pick-and-place such as insertion, pushing, and articulation — see Appendix K for full details. The tasks also have pose variation well beyond typical prior works using BC from human demos [1, 3–7, 46, 49, 65, 66].

### 4. Is MimicGen robust to noisy object pose estimates during data generation?

In the real world, we use the initial RGBD image to estimate object poses (see Appendix G). Thus, MimicGen is compatible with pose estimation methods and has some tolerance to pose error. We further investigated tolerance to pose estimate errors in simulation (see Appendix T) and found that while data generation rates can decrease (so data collection will take longer), policies trained on the generated data maintained the same level of performance.

### 5. Several recent works apply offline data augmentation to existing datasets to create more data. What are the advantages of generating new data online like MimicGen does?

Offline data augmentation can be effective for generating larger dataset for robot manipulation [7, 27–36]; however, it can be difficult to generate plausible interactions without prior knowledge of physics [27] or causal dependencies [32, 33], especially for new scenes, objects, or robots. In contrast, by generating new datasets through environment interaction, MimicGen data is guaranteed to be physically-consistent. Additionally, in contrast to many offline data augmentation methods, MimicGen is easy to implement and apply in practice, since only a small number of assumptions are needed (see Sec. 2). See more discussion in Appendix I.2.

### 6. What is the advantage of using replay-based imitation for data generation and then training a policy with BC (like MimicGen does) over using it as the final agent?

Replay-based imitation learning methods are promising for learning manipulation tasks using a handful of demonstrations [8–11, 52–54], but they have some limitations compared to MimicGen, which uses similar mechanisms during data generation, but trains an end-to-end closed-loop agent from the generated data. First, replay-based agents generally conform to a specific policy architecture, while MimicGen datasets allow full compatibility with a wide spectrum of offline policy learning algorithms [67]. Second, replay-based methods are typically *open-loop*, since they consist of replaying a demonstration blindly, while agents trained on MimicGen datasets can have *closed-loop*, reactive behavior, since the agent can respond to changes in observations. Finally, as we saw in Sec. 5 (and Appendix O), in many cases, the data generation success rate (a proxy for the performance of replay-based methods) can be significantly lower than the performance of trained agents. See more discussion in Appendix I.1.

### 7. Why might a data generation attempt result in a failure?

One reason is that the interpolation segments are unaware of the geometry in the scene and consist of naive linear interpolation (see Appendix M.2), so these segments might result in unintended collisions. Another is that the way source segments are transformed do not consider arm kinematics, so the end effector poses where segments start might be difficult to reach. A third reason is that certain source dataset motions might be easier for the controller to track than others.

### 8. When can MimicGen be applied to generate data for new objects?

698 We demonstrated results on geometrically similar rigid-body objects from the same cate-  
699 gory (e.g. mugs, carrots, pans) with similar scales. We also assumed aligned canonical  
700 coordinate frames for all objects in a category, and that the objects are well-described by  
701 their poses (e.g. rigid bodies, not soft objects). Extending the system for soft objects or  
702 more geometrically diverse objects is left for future work.

703 **9. Can MimicGen data contain undesirable characteristics?**

704 See Appendix [Q](#) for a discussion.

## C Limitations

In this section, we discuss limitations of MimicGen that can motivate and inform future work.

1. **Known sequence of object-centric subtasks.** MimicGen assumes knowledge of the object-centric subtasks in a task (which object is involved at each subtask) and also assumes that this sequence of subtasks does not change (Assumption 2, Sec. 2).
2. **Known object poses at start of each subtask during data generation.** During data generation, at the start of each object-centric subtask, MimicGen requires an object pose estimate of the reference object for that subtask (Assumption 3, Sec 2). However, we demonstrated that we can run MimicGen in the real world, using pose estimation methods (Sec. 5.4 and Appendix G), and has some tolerance to errors in pose estimates (Appendix T). Another avenue for real world deployment is to generate data and train policies in simulation (where object poses are readily available) and then deploy simulation-trained agents in the real world [60–64] — this is left for future work.
3. **One reference object per subtask.** MimicGen assumes each task is composed of a sequence of subtasks that are each relative to exactly one object (Assumption 2, Sec. 2). Being able to support subtasks where the motion depends on more than one object (for example, placing an object relative to two objects, or on a cluttered shelf) is left for future work.
4. **Naive filtering for generated data.** MimicGen has a naive way to filter data generation attempts (just task success rates). However, this does not prevent the generated datasets from being biased, or having artifacts (see discussion in Appendix Q). Developing better filtering mechanisms is left for future work.
5. **Naive interpolation scheme and no guarantee on collision-free motion.** MimicGen uses a naive linear interpolation scheme to connect transformed human segments together (Appendix M.2). However, this method is not aware of scene geometry, and consequently can result in unintended collisions if objects happen to be in the way of the straight line path. We opted for this simple approach to avoid the complexity of integrating a planner and ensuring it uses the same action space (Operational Space Control [68]). We also saw that longer interpolation segments could be harmful to policy learning from generated data (Appendix G). Similarly, ensuring that motion plans are not harmful to policy learning could be non-trivial. Developing better-quality interpolation segments (e.g. potentially with motion planning) that are both amenable to downstream policy learning and safer for real-world operation is left for future work.
6. **Object transfer limitations.** While MimicGen can generate data for manipulating different objects (Appendix F), we only demonstrated results on geometrically similar rigid-body objects from the same category (e.g. mugs, carrots, pans) with similar scales. We also assumed aligned canonical coordinate frames for all objects in a category, and that the objects are well-described by their poses (e.g. rigid bodies, not soft objects). Extending the system for soft objects or more geometrically diverse objects is left for future work.
7. **Task limitations.** MimicGen was demonstrated on quasi-static tasks — it is unlikely to work on dynamic, non quasi-static tasks in its current form. However, a large number of robot learning works and benchmarks use quasi-static tasks [1, 3–7, 14, 46, 49, 50, 57, 65, 66, 69–72], making the system broadly applicable. We also did not apply MimicGen to tasks where objects had different dynamics from the source demonstrations (e.g. new friction values). However, there is potential for MimicGen to work, depending on the task. Recall that on each data generation attempt, MimicGen tracks a target end effector pose path (Sec. 3.2) — this allows data generation for robot arms with different dynamics (Appendix E), and could potentially allow it to work for different object dynamics (e.g. pushing a cube across different table frictions).
8. **Mobile manipulation limitations.** In Sec. 5.1, we presented results for MimicGen on the Mobile Kitchen task, which requires mobile manipulation (base and arm motion). Our current implementation has some limitations. First, it assumes that the robot does not move the mobile base and arm simultaneously. Second, we simply copy the mobile base actions from the reference segment rather than transforming it like we do for end effector actions. We found this simple approach sufficient for the Mobile Kitchen task (more details

760 in Appendix [M.5](#)). Future work could integrate more sophisticated logic for generating base  
761 motion (e.g. defining and using a reference frame for each base motion segment, like the  
762 object-centric subtasks used for arm actions, and/or integrating a motion planner for the  
763 base).

764 9. **No support for multi-arm tasks.** MimicGen only works for single arm tasks — extending  
765 it to generate datasets for multi-manual manipulation [\[20\]](#) is left for future work.

## D Related Work

**Data Collection for Robot Learning.** There have been several data collection efforts to try and address the need for large-scale data in robotics. Some efforts have focused on self-supervised data collection where robots gather data on tasks such as grasping through trial-and-error [12–17]. RoboTurk [2, 18–21] is a system for crowdsourcing task demonstrations from human operators using smartphone-based teleoperation and video streams provided in web browsers. Several related efforts [3–6, 22] also collect large datasets (e.g. 1000s of demonstrations) by using a large number of human operators over extended periods of time. In contrast, MimicGen tries to make effective use of a small number of human demonstrations (e.g. 10) to generate large datasets. Some works have collected large datasets using pre-programmed demonstrators in simulation, such as RL Bench [69], Ravens [50], and VIMA [73]; however, it can be difficult to scale these approaches up to more complex tasks, while we show that MimicGen can be applied to a broad range of tasks. Prior work has also attempted to develop systems that can selectively query humans for demonstrations when they are needed, in order to reduce human operator time and burden [23–26]. In contrast, MimicGen only needs an operator to collect a few minutes of demonstrations at the start of the process. Generating large synthetic datasets has been a problem of great interest in other domains as well [37–43], and has also been used as a tool for benchmarking motion planning [74].

**Imitation Learning for Robot Manipulation.** Imitation Learning (IL) seeks to train policies from a set of demonstrations. Behavioral Cloning (BC) [44] is a standard method for learning policies offline, by training the policy to mimic the actions in the demonstrations. It has been used extensively in prior work for robot manipulation [1, 20, 45–51] — in this work, we use BC to train single-task policies from datasets generated by MimicGen. However, MimicGen can also be used to generate datasets for a wide range of existing offline learning algorithms that learn from diverse multi-task datasets [59, 65, 75–79]. Some works have used offline data augmentation to increase the dataset size for learning policies [7, 27–36] — in this work we collect new datasets.

**Replay-Based Imitation Learning.** While BC is simple and effective, it typically requires several demonstrations to learn a task [7]. To alleviate this, many recent imitation learning methods try to learn policies from only a handful of demonstrations by *replaying* demonstrations in new scenes [8–11, 52–54]. Some methods [9–11] use trained networks that help the robot end effector approach poses from which a demonstration can be replayed successfully. In particular, Di Palo et al. [11] proposes an approach to replay parts of a single demonstration to solve multi-stage tasks — this is similar to the way MimicGen generates new datasets. However they make a number of assumptions that we do not (4D position and yaw action space vs. our 6-DoF action space, a single wrist camera view to enable spatial generalization). Furthermore, this work and others use demonstration replay as a component of the final trained agent — in contrast, we use it as a data generation mechanism. Consequently, these prior approaches are complementary to our data generation system, and in principle, could be used as a part of alternative schemes for data generation. In this work, we focus on the general framework of using such demonstration replay mechanisms to generate data that can be seamlessly integrated into existing imitation learning pipelines, and opt for an approach that emphasizes simplicity (more discussion in Appendix I). Our experiments also show that there can be a large benefit from collecting large datasets and training agents from them, instead of directly deploying a replay-based agent.

## E Robot Transfer

In Sec. 5, we summarized results that show MimicGen can generate data for diverse robot hardware. Recall that we took the source datasets from the Square and Threading tasks (which use the Panda arm) and generated datasets for the Sawyer, IIWA, and UR5e robots across the  $D_0$  and  $D_1$  reset distribution variants (see Fig. E.1). Here, we present the complete set of results.

Notice that although the data generation rates have a large spread across robots (range 20%-74% for  $D_0$ , see Table E.1), the policy success rates are significantly higher and remarkably similar across robots (for example, 80%-91% on Square  $D_0$  and 89%-98% on Threading  $D_0$  — see the full image-based agent results in Table E.2 and low-dim agent results in Table E.3). This shows the potential for using human demonstrations across robot hardware using MimicGen, an exciting prospect, as teleoperated demonstrations are typically constrained to a single robot.

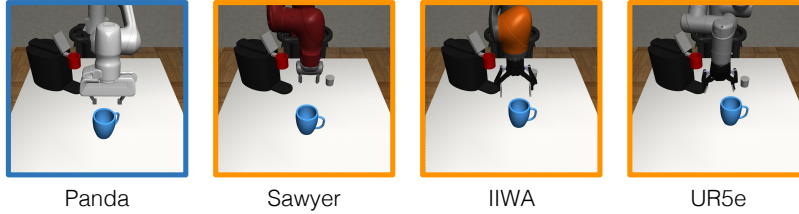

Figure E.1: **Robots used in Robot Transfer Experiment.** The figure shows the robot arms used for data generation. Source datasets were collected on the Panda arm (blue border) and used to generate data for the Sawyer, IIWA, and UR5e arms (orange border).

| Task Variant        | Panda | Sawyer | IIWA | UR5e |
|---------------------|-------|--------|------|------|
| Square ( $D_0$ )    | 73.7  | 55.8   | 37.7 | 64.7 |
| Square ( $D_1$ )    | 48.9  | 38.8   | 26.5 | 34.1 |
| Threading ( $D_0$ ) | 51.0  | 28.8   | 20.4 | 21.4 |
| Threading ( $D_1$ ) | 39.2  | 23.7   | 11.5 | 18.5 |

Table E.1: **Data Generation Rates on Different Robot Hardware.** The success rates of data generation are different across different robot arms (yet agents trained on these datasets achieve similar task success rates).

| Task Variant        | Panda          | Sawyer         | IIWA           | UR5e           |
|---------------------|----------------|----------------|----------------|----------------|
| Square ( $D_0$ )    | $90.7 \pm 1.9$ | $86.0 \pm 1.6$ | $80.0 \pm 4.3$ | $84.7 \pm 0.9$ |
| Square ( $D_1$ )    | $73.3 \pm 3.4$ | $60.7 \pm 2.5$ | $48.0 \pm 3.3$ | $56.0 \pm 4.3$ |
| Threading ( $D_0$ ) | $98.0 \pm 1.6$ | $88.7 \pm 7.5$ | $94.0 \pm 3.3$ | $91.3 \pm 0.9$ |
| Threading ( $D_1$ ) | $60.7 \pm 2.5$ | $50.7 \pm 3.8$ | $49.3 \pm 4.1$ | $60.7 \pm 2.5$ |

Table E.2: **Agent Performance on Different Robot Hardware.** We use MimicGen to produce datasets across different robot arms using the same set of 10 source demos (collected on the Panda arm) and train image-based agents on each dataset (3 seeds). The success rates are comparable across the different robot arms, indicating that MimicGen can generate high-quality data across robot hardware.

| Task Variant        | Panda          | Sawyer         | IIWA           | UR5e           |
|---------------------|----------------|----------------|----------------|----------------|
| Square ( $D_0$ )    | $98.0 \pm 1.6$ | $87.3 \pm 1.9$ | $79.3 \pm 2.5$ | $82.0 \pm 1.6$ |
| Square ( $D_1$ )    | $80.7 \pm 3.4$ | $69.3 \pm 2.5$ | $55.3 \pm 1.9$ | $67.3 \pm 3.4$ |
| Threading ( $D_0$ ) | $97.3 \pm 0.9$ | $96.7 \pm 2.5$ | $93.3 \pm 0.9$ | $96.0 \pm 1.6$ |
| Threading ( $D_1$ ) | $72.0 \pm 1.6$ | $73.3 \pm 2.5$ | $67.3 \pm 4.7$ | $80.0 \pm 4.9$ |

Table E.3: **Low-Dim Agent Performance on Different Robot Hardware.** We use MimicGen to produce datasets across different robot arms using the same set of 10 source demos (collected on the Panda arm) and train agents on each dataset (3 seeds). The success rates are comparable across the different robot arms, indicating that MimicGen can generate high-quality data across robot hardware.



## 819 F Object Transfer

820 In Sec. 5, we summarized results that show MimicGen can generate data for different objects. Recall  
 821 that we took the source dataset from the Mug Cleanup task and generated data with MimicGen for  
 822 an unseen mug ( $O_1$ ) and for a set of 12 mugs ( $O_2$ ). Here, we present the complete set of results  
 823 (Table F.1) and also visualize the mugs used for this experiment (Fig. F.1).

824 The Mobile Kitchen task that we generated data for also had different object variants — we show  
 825 the 3 pans and 3 carrots in Fig. F.2. Results for this task are in Fig. 4 (image-based agents) and in  
 826 Table P.1 (low-dim agents).

827 While these results are promising, we only demonstrated results on geometrically similar rigid-body  
 828 objects from the same category (e.g. mugs, carrots, pans) with similar scales. We also assumed  
 829 aligned canonical coordinate frames for all objects in a category, and that the objects are well-  
 830 described by their poses (e.g. rigid bodies, not soft objects). Extending the system for soft objects  
 831 or more geometrically diverse objects is left for future work.

| Task                      | $D_0$          | $O_1$          | $O_2$          |
|---------------------------|----------------|----------------|----------------|
| Mug Cleanup (DGR)         | 29.5           | 31.0           | 24.5           |
| Mug Cleanup (SR, image)   | $80.0 \pm 4.9$ | $90.7 \pm 1.9$ | $75.3 \pm 5.2$ |
| Mug Cleanup (SR, low-dim) | $82.0 \pm 2.8$ | $88.7 \pm 4.1$ | $66.7 \pm 2.5$ |

Table F.1: **Object Transfer Results.** We present data generation rates (DGR) and success rates (SR) of trained agents on the  $O_1$  and  $O_2$  variants of the Mug Cleanup task, which have an unseen mug, and a set of 12 mugs (a new mug per episode) respectively.

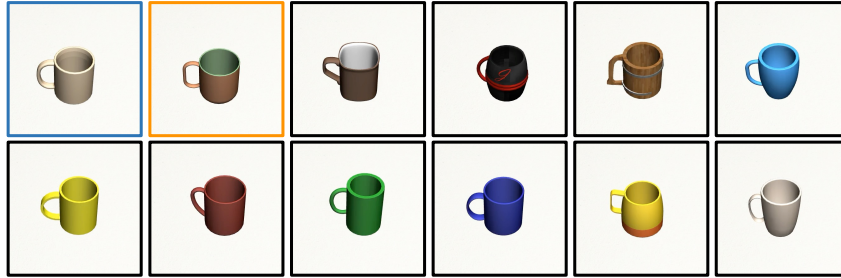

Figure F.1: **Objects used in Object Transfer Experiment.** The figure shows the mug used in the Mug Cleanup  $D_0$  task (blue border), the unseen one in the  $O_1$  task (orange border), and the complete set of mugs in the  $O_2$  task.

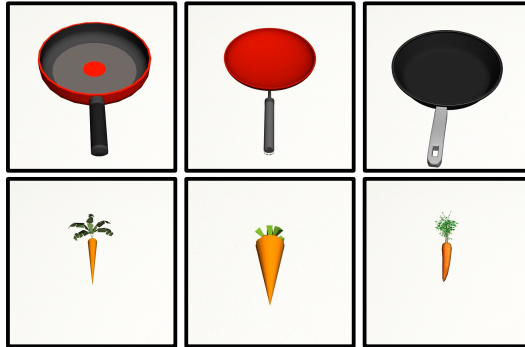

Figure F.2: **Objects used in Mobile Kitchen task.** The figure shows the 3 pans and 3 carrots used in the Mobile Kitchen task. On each episode a random pan and carrot are selected and initialized in the scene.



## 832 G Real Robot Results

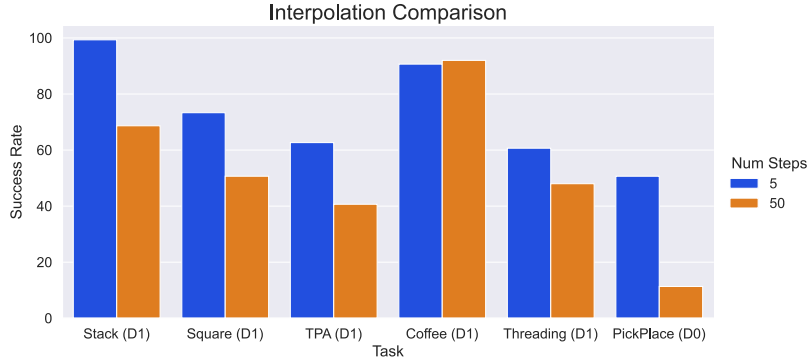

Figure G.1: **Effect of Increasing Interpolation Steps.** Comparing the effect of interpolation steps on trained image-based agents. Using an increased amount of interpolation can cause agent performance to decrease significantly. This could explain the gap between real-world and simulation agent performance.

833 In this section, we first provide further details on how we applied MimicGen to the real world tasks  
 834 in Fig. 5, then we provide additional experiment results that help to explain the gap in trained policy  
 835 performance between simulation and real.

836 **Real Robot Data Collection Details.** Recall that during data generation, MimicGen requires pose  
 837 estimates at the start of each object-centric subtask (Assumption 3, Sec. 2). To do this, we use a  
 838 front-view Intel RealSense D415 camera which has been calibrated (e.g. known extrinsics). We  
 839 first convert the RGBD image to a point cloud and remove the table plane via RANSAC [80]. We  
 840 then apply DBSCAN [81] clustering to identify object segments of interest, though alternative seg-  
 841 mentation methods such as [82, 83] are also applicable. In the Stack task, the cube instances are  
 842 distinguished by their color. In the Coffee task, the coffee machine and the pod are distinguished  
 843 based on the segment dimensions. Finally for each identified object segment, we leverage [84] for  
 844 global pose initialization, followed by ICP [85] refinement. Note that while the current pose esti-  
 845 mation pipeline works reasonably well, our framework is not specific to certain types of perception  
 846 methods. Recent [86–88] and future advances in state estimation could be used to apply MimicGen  
 847 in real-world settings with less assumptions about the specific objects.

848 **Gap in Policy Performance between Sim and Real.** While we saw a significantly high data col-  
 849 lection success rate (82.3% for Stack, 52.1% for Coffee), we saw much lower policy success rate on  
 850 these tasks than in simulation (36% vs. 100% for Stack, and 14% vs.  $\sim 90\%$  for Coffee), as described  
 851 in Sec. 5). While there was considerably less data in the real world due to the time-consuming nature  
 852 of real-world data collection (100 demos instead of 1000 demos), there were also other factors that  
 853 could explain this gap.

854 As a safety consideration, our real-world tasks used much larger interpolation segments of  $n_{\text{interp}} =$   
 855  $25$ ,  $n_{\text{fixed}} = 25$  instead of the simulation default ( $n_{\text{interp}} = 5$ ,  $n_{\text{fixed}} = 0$ ) (see Appendix M.2 and  
 856 Appendix M.6). We hypothesized that the increased duration of the interpolation segments made  
 857 them difficult to imitate, since there was little association between the motion and what the agent sees  
 858 in the observations (the motions are slow, and do not generally move towards regions of interest).  
 859 To further investigate this, we ran an experiment in simulation where we used the same settings for  
 860 interpolation for a subset of our tasks. The results are presented in Fig. G.1.

861 We see that for certain tasks, the larger interpolation segments cause agent performance to decrease  
 862 significantly — for example image-based agents on Stack  $D_1$  decrease from 99.3% success to 68.7%  
 863 success, and image based agents on Pick Place decrease from 50.7% to 11.3%. These results confirm  
 864 that the larger segments (together with the smaller dataset size) may have been responsible for lower  
 865 real world performance. Developing better-quality interpolation segments that are both safe for  
 866 real-world operation and amenable to downstream policy learning is left for future work.

867 Combining MimicGen with sim-to-real policy deployment methods [60–64] is another exciting av-  
 868 enue for future work —simulation does not suffer from the same bottlenecks as real-world data

869 collection (slow and time-consuming, requiring multiple arms and human supervisors to reset the  
870 task), making simulation an ideal setting for MimicGen to generate large-scale diverse datasets.

## H Different Demonstrators

| Task                                | D <sub>0</sub> | D <sub>1</sub> | D <sub>2</sub> |
|-------------------------------------|----------------|----------------|----------------|
| Stack Three (Op. A, image)          | 92.7 $\pm$ 1.9 | 86.7 $\pm$ 3.4 | -              |
| Stack Three (Op. B, image)          | 86.0 $\pm$ 0.0 | 69.3 $\pm$ 5.0 | -              |
| Threading (Op. A, image)            | 98.0 $\pm$ 1.6 | 60.7 $\pm$ 2.5 | 38.0 $\pm$ 3.3 |
| Threading (Op. B, image)            | 98.0 $\pm$ 1.6 | 58.0 $\pm$ 4.3 | 38.0 $\pm$ 8.6 |
| Three Pc. Assembly (Op. A, image)   | 82.0 $\pm$ 1.6 | 62.7 $\pm$ 2.5 | 13.3 $\pm$ 3.8 |
| Three Pc. Assembly (Op. B, image)   | 76.0 $\pm$ 1.6 | 54.7 $\pm$ 6.8 | 5.3 $\pm$ 1.9  |
| Stack Three (Op. A, low-dim)        | 88.0 $\pm$ 1.6 | 90.7 $\pm$ 0.9 | -              |
| Stack Three (Op. B, low-dim)        | 82.7 $\pm$ 0.9 | 84.0 $\pm$ 3.3 | -              |
| Threading (Op. A, low-dim)          | 97.3 $\pm$ 0.9 | 72.0 $\pm$ 1.6 | 60.7 $\pm$ 6.2 |
| Threading (Op. B, low-dim)          | 97.3 $\pm$ 0.9 | 76.0 $\pm$ 4.3 | 70.0 $\pm$ 1.6 |
| Three Pc. Assembly (Op. A, low-dim) | 74.7 $\pm$ 3.8 | 61.3 $\pm$ 1.9 | 38.7 $\pm$ 4.1 |
| Three Pc. Assembly (Op. B, low-dim) | 77.3 $\pm$ 2.5 | 65.3 $\pm$ 7.4 | 46.0 $\pm$ 9.1 |

Table H.1: **MimicGen with Different Demonstrators.** We show that policies trained on MimicGen data can achieve similar performance even when the source demonstrations come from different demonstrators. Operator B used a different teleoperation device than Operator A, but policy training results on generated datasets are comparable for both image-based and low-dim agents.

| Task                     | D <sub>0</sub> | D <sub>1</sub> | D <sub>2</sub> |
|--------------------------|----------------|----------------|----------------|
| Square (Better, image)   | 90.7 $\pm$ 1.9 | 73.3 $\pm$ 3.4 | 49.3 $\pm$ 2.5 |
| Square (Okay, image)     | 90.0 $\pm$ 1.6 | 64.0 $\pm$ 7.1 | 50.0 $\pm$ 2.8 |
| Square (Worse, image)    | 90.7 $\pm$ 0.9 | 59.3 $\pm$ 2.5 | 45.3 $\pm$ 4.1 |
| Square (Better, low-dim) | 98.0 $\pm$ 1.6 | 80.7 $\pm$ 3.4 | 58.7 $\pm$ 1.9 |
| Square (Okay, low-dim)   | 95.3 $\pm$ 0.9 | 82.0 $\pm$ 1.6 | 60.7 $\pm$ 1.9 |
| Square (Worse, low-dim)  | 95.3 $\pm$ 0.9 | 76.7 $\pm$ 5.0 | 52.7 $\pm$ 1.9 |

Table H.2: **MimicGen with Lower Quality Demonstrators.** We show that policies trained on MimicGen data can achieve similar performance even when the source demonstrations come from lower quality demonstrators. We compare across source datasets from the “Better”, “Okay”, and “Worse” subsets of the robomimic Square-MH dataset [7], which was collected by operators of different proficiency. Policy training results on generated datasets are comparable for both image-based and low-dim agents.

While most of our experiments use datasets from one particular operator, we show that MimicGen can easily use demonstrations from different operators of mixed quality. We first collected 10 source demonstrations from a different operator on the Stack Three, Threading, and Three Piece Assembly tasks — this operator also used a different teleoperation device (3D mouse [55,89]). We also used 10 demonstrations from one of the “Okay” operators and one of the “Worse” operators in the robomimic Square-MH dataset [7] to see if MimicGen could use lower-quality datasets. These source datasets were then provided to MimicGen to generate 1000 demonstrations for all task variants, and subsequently train policies — the results are summarized in Table H.1 (different demonstrator with different teleoperation device) and Table H.2 (lower quality demonstrators).

Interestingly, the operator using a different teleoperation interface produced policies that were extremely similar in performance to our original results (deviations of 0% to 17%). Furthermore, the policies produced from the datasets generated with the “Worse” and “Okay” operator data are also extremely similar in performance (deviations of 0% to 14%). This is quite surprising, as the robomimic study [7] found that there can be significant difficulty in learning from datasets produced by less experienced operators. **Our results suggest that in the large data regime, the harmful effects of low-quality data might be mitigated.** This is an interesting finding that can inform future work into learning from suboptimal human demonstrations [90–95].

## I Motivation for MimicGen over Alternative Methods

In this section, we expand on the motivation for using data generation with MimicGen over two alternatives — replay-based imitation learning and offline data augmentation.

### I.1 Replay-Based Imitation Learning

Several recent works learn policies using only a handful of demonstrations by replaying the demonstrations in new scenes [8–11, 52–54]. While these methods are promising, there are some limitations. One limitation is that their learned policy usually uses demonstration replay as a part of their agent. This means that the policy is often composed of hybrid stages (such as a self-supervised network that learns to move the arm to configurations from which replay will be successful and a replay stage). By contrast, MimicGen uses a similar mechanism to *generate datasets* — this allows full compatibility with a wide spectrum of offline policy learning algorithms [67]. These datasets also allow for evaluating different design decisions (such as different observation spaces and learning methods), including the potential for multi-task benchmarks consisting of high-quality human data. Furthermore, by easily allowing datasets to be created and curated, MimicGen can facilitate future work to investigate how dataset composition can influence learned policy proficiency.

Another limitation is that replay-based imitation methods are typically *open-loop*, since they consist of replaying a demonstration blindly (the trajectory executed by the robot cannot adapt to small errors). By contrast, agents trained on MimicGen datasets can have *closed-loop*, reactive behavior, since the agent can respond to changes in observations.

Finally, as we saw in Sec. 5 (and Appendix O), in many cases, the data generation success rate (a proxy for the performance of replay-based methods) can be significantly lower than the performance of trained agents (one reason for this might be because of only training the policy on the successful data generation attempts, and another might be due to agent generalization).

### I.2 Offline Data Augmentation

Several works have used offline data augmentation to increase the dataset size for learning policies [7, 27–36]. Since this process is offline, it can greatly increase the size of the dataset. In fact, this can be complementary to MimicGen — we leverage pixel shift randomization [7, 28–31] when training image-based agents on MimicGen data.

However, because data augmentation is offline, it can be difficult to generate plausible interactions without prior knowledge of physics [27] or causal dependencies [32, 33], especially for new scenes, objects, or robots. Instead, MimicGen opts for generating new datasets through environment interaction by re-purposing existing human demonstrations — this automatically leads to physically-consistent data, since generation is online. In contrast to many offline data augmentation methods, MimicGen is easy to implement and apply in practice, since only a small number of assumptions are needed (see Sec. 2).

Similar to MimicGen, some recent works [34–36] have also shown an ability to create datasets with new objects, but these works typically change *distractor* objects that are not involved in manipulation — this leads to encouraging behavioral invariances (e.g. tell the policy to apply the same actions, even if the background and irrelevant objects are changed). By contrast, MimicGen generates datasets with new objects that are a critical part of the manipulation task — it seeks to generate data by adapting behavior to new contexts.

## 930 J Additional Details on Object-Centric Subtasks

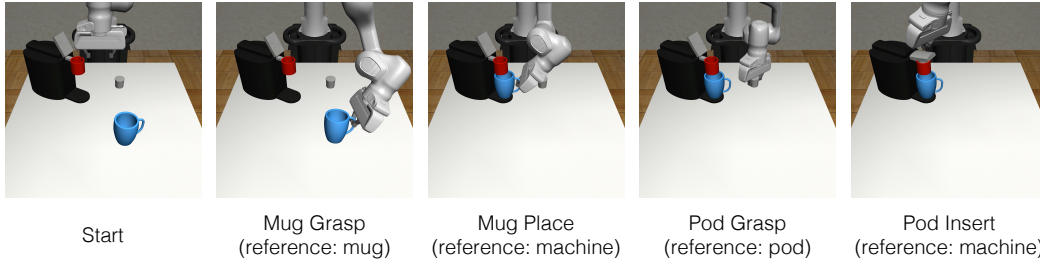

Figure J.1: **Illustrative Example of Object-Centric Subtasks.** In this example, the robot must prepare a cup of coffee by placing the mug on the machine, and the coffee pod into the machine. This task is easily broken down into a sequence of object-centric subtasks — this figure shows the end of each subtask, and the relevant object for each subtask. There is a mug grasping subtask (motion relative to mug), a mug placement subtask (motion relative to machine), a pod grasping subtask (motion relative to pod), and a pod insertion subtask (motion relative to machine). The robot can solve this task by sequencing motions relative to each object frame (one per subtask).

931 Object-centric subtasks (Assumption 2 in Sec. 2) are a key part of how MimicGen generates new  
 932 demonstrations. In this section, we provide more details on how they are defined, and how sub-  
 933 task segments are parsed from the source demonstrations. We also show some examples to build  
 934 intuition.

### 935 J.1 How Tasks can be broken up into Object-Centric Subtasks

936 We first restate Assumption 2 — we assume that **tasks consist of a known sequence of**  
 937 **object-centric subtasks.** Let  $\mathcal{O} = \{o_1, \dots, o_K\}$  be the set of objects in a task  $\mathcal{M}$ . As  
 938 in Di Palo et al. [11], we assume that tasks consist of a sequence of object-centric subtasks  
 939  $(S_1(o_{S_1}), S_2(o_{S_2}), \dots, S_M(o_{S_M}))$ , where the manipulation in each subtask  $S_i(o_{S_i})$  is relative to  
 940 a single object’s  $(o_{S_i} \in \mathcal{O})$  coordinate frame. We assume this sequence is known.

941 Specifying the sequence of object-centric subtasks is generally easy and intuitive for a human to do.  
 942 As a first example, consider the coffee preparation task shown in Fig. J.1 (and Fig. 2). A robot must  
 943 prepare a cup of coffee by grasping a mug, placing it on the coffee machine, grasping a coffee pod,  
 944 inserting the pod into the machine, and closing the machine lid. This task can be broken down into  
 945 a sequence of object-centric subtasks: a mug-grasping subtask (motion is relative to mug), a mug-  
 946 placement subtask (motion relative to machine), a pod-grasping subtask (motion relative to pod),  
 947 and a final pod-insertion and lid-closing subtask (motion relative to machine). Consequently, the  
 948 robot can solve this task by sequencing several object-centric motions together. This is the key idea  
 949 behind how MimicGen data generation works — it takes a set of source human demos, breaks them  
 950 up into segments (where each segment solves a subtask), and then applies each subtask segment in  
 951 a new scene. The subtasks are visualized in Fig. J.1.

952 We also emphasize that a wide variety of tasks can be broken down into object-centric subtasks (e.g.  
 953 Assumption 2 applies to a wide variety of tasks, especially those that are commonly considered in  
 954 the robot learning community). Fig. J.2 illustrates subtasks for some of our tasks (more discussion  
 955 in Appendix J.3 below).

### 956 J.2 Parsing the Source Dataset into Object-Centric Subtask Segments

957 We now provide more details on the parsing procedure described in Sec. 3.1. Recall that we would  
 958 like to parse every trajectory  $\tau$  in the source dataset into segments  $\{\tau_i\}_{i=1}^M$ , where each segment  $\tau_i$   
 959 corresponds to a subtask  $S_i(o_{S_i})$ . We assume access to metrics that allow the end of each subtask  
 960 to be detected automatically. In our running example from Fig. 2, this would correspond to metrics  
 961 that use the state of the robot and objects to detect when the mug grasp, mug placement, pod grasp,  
 962 and machine lid close occurs. This information is usually readily available in simulation, as it  
 963 is often required for checking task success. With these metrics, we can easily run through the  
 964 set of demonstrations, detect the end of each subtask sequentially, and use those as the subtask

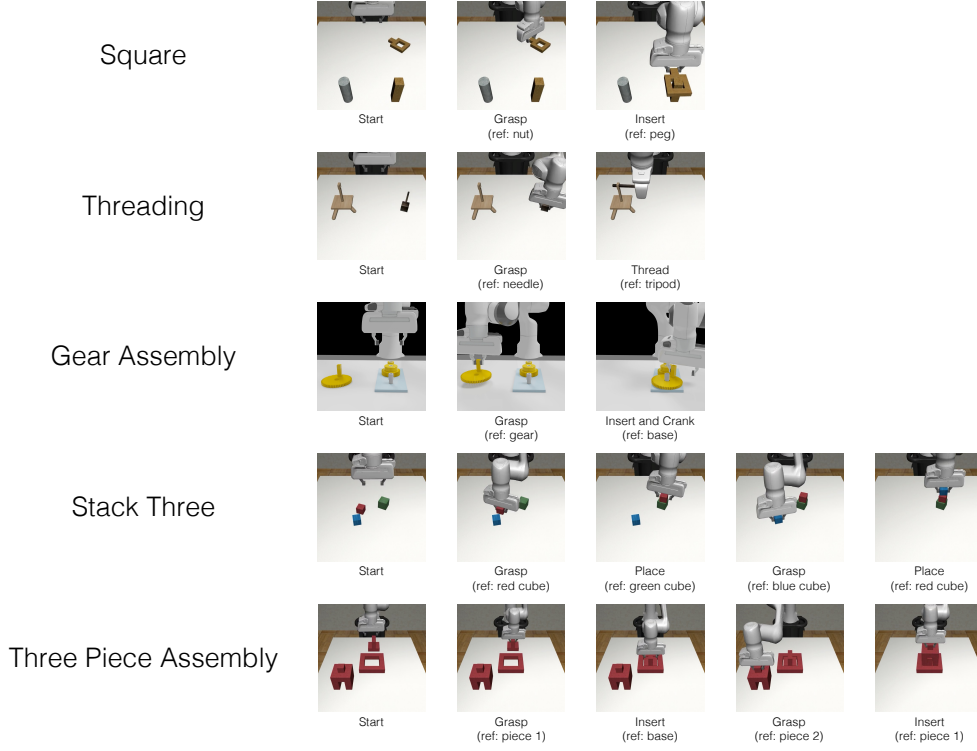

Figure J.2: **Object-Centric Subtasks for Selected Tasks** This figure shows the end of each object-centric subtask (and the reference object) for a subset of the tasks in the main text. MimicGen assumes that this subtask structure is known for each task; however, specifying this subtask structure is generally easy and intuitive for a human.

965 boundaries, to end up with every trajectory  $\tau \in \mathcal{D}_{\text{src}}$  split into a contiguous sequence of segments  
 966  $\tau = (\tau_1, \tau_2, \dots, \tau_M)$ , one per subtask.

967 **However, another alternative that requires no privileged information (and hence is suitable**  
 968 **for real world settings) is to have a human manually annotate the end of each subtask.** As the  
 969 number of source demonstrations is usually small, this is easy for a human operator to do, either  
 970 while collecting each demonstration or annotating them afterwards. In this work, we opted for the  
 971 former method (automated subtask end metrics) because they were readily available for our tasks or  
 972 easy to craft.

### 973 J.3 Specific Examples

974 We provide some examples in this section of how some tasks are broken up into object-centric sub-  
 975 tasks. The examples are provided in Fig. J.2. For each task below, we outline the object-centric  
 976 subtasks, and the subtask end detection metrics used for parsing the source human demos into seg-  
 977 ments that correspond to each subtask. Note that these metrics are only used for parsing the source  
 978 human demos and are not assumed to be available during policy execution.

979 **Square.** There are 2 subtasks — grasping the nut (motion relative to nut) and inserting the nut  
 980 onto the peg (motion relative to peg). To detect the end of the grasp subtask, we check for contact  
 981 between the robot fingers and the nut. For the insertion subtask, we just use the task success check.

982 **Threading.** There are 2 subtasks — grasping the needle (motion relative to needle) and threading  
 983 the needle into the tripod (motion relative to tripod). To detect the end of the grasp subtask, we  
 984 check for contact between the robot fingers and the needle. For the threading subtask, we just use  
 985 the task success check.

986 **Gear Assembly.** There are 2 subtasks — grasping the gear (motion relative to gear) and inserting  
987 the gear into the base and turning the crank (motion relative to base). To detect the end of the grasp  
988 subtask, we check if the gear has been lifted by a threshold. For the insertion subtask, we just use  
989 the task success check.

990 **Stack Three.** There are 4 subtasks — grasping the red block (motion relative to red block), placing  
991 the red block onto the green block (motion relative to green block), grasping the blue block (motion  
992 relative to blue block), and placing the blue block onto the red block (motion relative to red block).  
993 To detect the end of each grasp subtask we check for contact between the robot fingers and the  
994 relevant block. For each place subtask, we check that the relevant block has been lifted and is in  
995 contact with the block that should be underneath it.

996 **Three Piece Assembly.** There are 4 subtasks — grasping the first piece (motion relative to first  
997 piece), inserting the first piece into the base (motion relative to base), grasping the second piece  
998 (motion relative to second piece), and inserting the second piece onto the first piece (motion relative  
999 to first piece). To detect the end of each grasp subtask, we check for contact between the robot  
1000 fingers and the relevant piece. For each insertion subtask, we re-use the insertion check from the  
1001 task success check.



## 1002 K Tasks and Task Variants

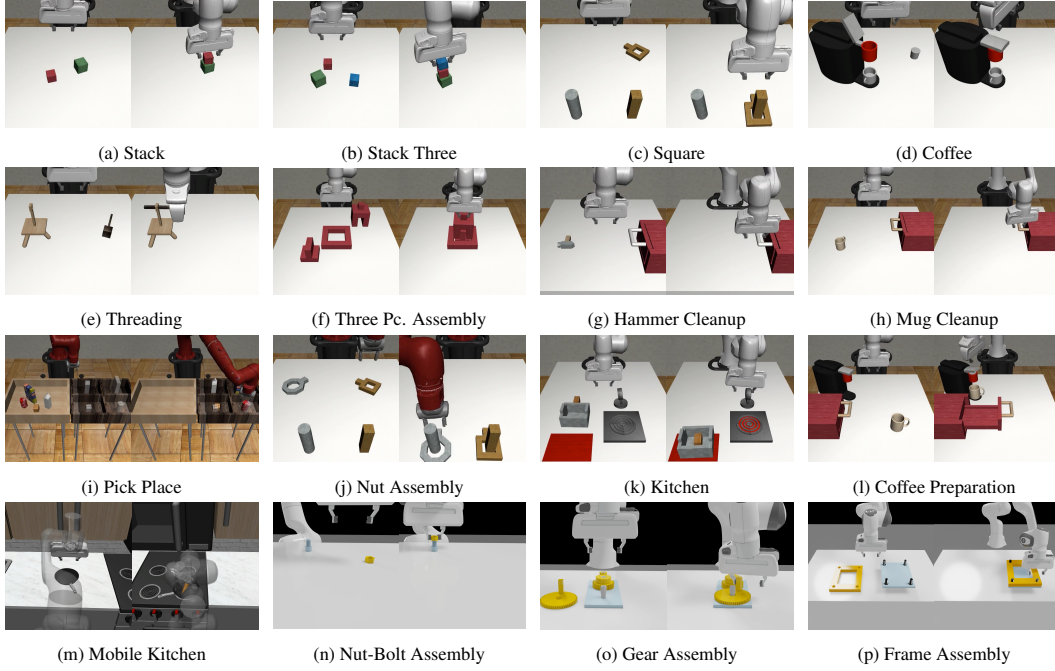

Figure K.1: **Tasks (all)**. We show all of the simulation tasks in the figure above. They span a wide variety of behaviors including pick-and-place, precise insertion and articulation, and mobile manipulation, and include long-horizon tasks requiring chaining several behaviors together.

In this section, we provide more detailed descriptions of each of our tasks and task variants. The tasks (Fig. K.1) and task variants (especially their reset distributions) are best appreciated on the website (<https://sites.google.com/view/corl2023mimicgen/home>). We group the tasks into categories as in Sec. 4 and describe the goal, the variants, and the object-centric subtasks in each task. As mentioned in Sec. 2 and Appendix. M.1, the tasks have a delta-pose action space (implemented with an Operational Space Controller [68]). Control happens at 20 Hz.

**Basic.** A basic set of box stacking tasks.

- **Stack [55]** Stack a red block on a green one. Blocks initialized in a small region ( $D_0$ ) and large region ( $D_1$ ). There are 2 subtasks (grasp red block, place onto green). We also develop a version of this task in the real-world (Fig. 5).
- **Stack Three.** Same as Stack, but additionally stack a blue block on the red one - has a small ( $D_0$ ) and large ( $D_1$ ) variant. There are 4 subtasks (grasp red block, place onto green, grasp blue block, place onto red).

**Contact-Rich.** A set of tasks that involve contact-rich behaviors such as insertion or drawer articulation. In each  $D_0$  variant, at least one object never moves.

- **Square [7].** Pick a square nut and place on a peg. ( $D_0$ ) Peg never moves, nut is placed in small region. ( $D_1$ ) Peg and nut move in entire workspace, but peg rotation fixed. ( $D_2$ ) Peg rotation also varies. There are 2 subtasks (grasp nut, place onto peg).
- **Threading [19].** Pick a needle and thread through a hole on a tripod. ( $D_0$ ) Tripod is fixed, needle moves in modest region. ( $D_1$ ) Tripod and needle move in large regions on the left and right portions of the table respectively. ( $D_2$ ) Tripod and needle are initialized on the right and left respectively (reversed from  $D_1$ ). There are 2 subtasks (grasp needle, thread into tripod).
- **Coffee [19].** Pick a coffee pod, insert into coffee machine, and close the machine hinge. ( $D_0$ ) Machine never moves, pod moves in small box. ( $D_1$ ) Machine and pod move in large regions on the left and right portions of the table respectively. ( $D_2$ ) Machine and pod are initialized on the right and left respectively (reversed from  $D_1$ ). We also develop a version

of this task in the real-world (Fig. 5). There are 2 subtasks (grasp pod, insert-into and close machine).

- **Three Piece Assembly.** Pick one piece, insert it into the base, then pick the second piece, and insert into the first piece to assemble a structure. ( $D_0$ ) base never moves, both pieces move around base with fixed rotation. ( $D_1$ ) All three pieces move in workspace with fixed rotation. ( $D_2$ ) All three pieces can rotate. There are 4 subtasks (grasp piece 1, place into base, grasp piece 2, place into piece 2).
- **Hammer Cleanup [59].** Open drawer, pick hammer, and place into drawer, and close drawer. ( $D_0$ ) Drawer is fixed, and hammer initialized in small region. ( $D_1$ ) Drawer and hammer both move in large regions. There are 3 subtasks (open drawer, grasp hammer, place into drawer and close).
- **Mug Cleanup.** Similar to Hammer Cleanup but with a mug and with additional variants. ( $O_1$ ) A different mug is used. ( $O_2$ ) On each task reset, one of 12 mugs is sampled. There are 3 subtasks as in Hammer Cleanup.

**Long-Horizon.** A set of tasks that require chaining multiple behaviors together.

- **Kitchen [59].** Switch stove on, place pot onto stove, place bread into pot, place pot in front of serving region and push it there, and turn off the stove. ( $D_0$ ) Bread and pot move in small region, other items fixed. ( $D_1$ ) Bread, pot, stove, button, and serving region all move in wider regions. There are 7 subtasks (turn stove on, grasp pot, place pot on stove, grasp bread, place bread in pot, serve pot onto serving region, and turn stove off).
- **Nut Assembly [55].** Similar to Square, but place both a square nut and round nut onto two different pegs. ( $D_0$ ) Each nut is initialized in a small box. There are 4 subtasks (grasp each nut and place onto each peg).
- **Pick Place [55].** Place four objects into four different bins. ( $D_0$ ) Objects are initialized anywhere within the large box. We use a slightly simpler version of this task where the objects are initialized with top-down rotations between 0 and 90 degrees (instead of any top-down rotation). There are 8 subtasks (grasp each object and place into each bin).
- **Coffee Preparation.** A full version of Coffee — load mug onto machine, open machine, retrieve coffee pod from drawer and insert into machine. ( $T_0$ ) Mug moves in modest region while machine and drawer are fixed. ( $T_1$ ) Machine also moves in modest region. There are 5 subtasks (grasp mug, place onto machine and open lid, open drawer, grasp pod, insert into machine and close lid).

**Mobile Manipulation.** Tasks involving mobile manipulation.

- **Mobile Kitchen.** Set up frying pan, by retrieving a pan from counter and placing onto stove, followed by retrieving a carrot from sink and placing onto pan. ( $D_0$ ) The pan starts in a region in the center of the countertop and the carrot starts in a region inside the sink. There are three possible pans and three possible carrots sampled randomly for each episode. There are 4 subtasks (grasp pan, place pan, grasp carrot, place carrot). The latter three stages involve operating the mobile base.

**Factory.** A set of high-precision tasks in Factory [57].

- **Nut-and-Bolt Assembly.** Pick nut and align onto a bolt. ( $D_0$ ) Nut and bolt initialized in modest regions. ( $D_1$ ) Nut and bolt initialized anywhere in workspace with fixed rotation. ( $D_2$ ) Nut and bolt can rotate. There are 2 subtasks (pick nut and place onto bolt)
- **Gear Assembly.** Pick a gear, insert it onto a shaft containing other gears, and turn the gear crank to move the other gears. ( $D_0$ ) Base is fixed, and gear moves in modest region. ( $D_1$ ) Base and gear move in larger regions with fixed rotation. ( $D_2$ ) Both move with rotations. There are 2 subtasks (grasp gear, insert into base and crank).
- **Frame Assembly.** Pick a picture frame border with 4 holes and insert onto a base with 4 bolts rigidly attached. ( $D_0$ ) Frame border and base move in small region. ( $D_1$ ) Frame border and base move in much larger regions with fixed rotation. ( $D_2$ ) Both move with rotations. There are 2 subtasks (grasp frame border and insert into base).

## 1081 L Derivation of Subtask Segment Transform

1082 In this section, we provide a complete derivation of the source subtask segment transformation  
 1083 presented in Sec. 3.2. Recall that  $T_B^A$  denotes a homogenous  $4 \times 4$  matrix that represents the pose  
 1084 of frame  $A$  with respect to frame  $B$ . We have chosen a source subtask segment consisting of target  
 1085 poses for the end effector controller (Assumption 1, Sec. 2)  $\tau_i = (T_W^{C_0}, T_W^{C_1}, \dots, T_W^{C_K})$  where  $C_t$   
 1086 is the controller target pose frame at timestep  $t$ ,  $W$  is the world frame, and  $K$  is the length of the  
 1087 segment.

1088 We would like to transform  $\tau_i$  according to the new pose of the corresponding object in the current  
 1089 scene (frame  $O'_0$  with pose  $T_W^{O'_0}$ ) so that the relative poses between the target pose frame and the  
 1090 object frame are preserved at each timestep ( $T_{O'_0}^{C'_t} = T_{O_0}^{C_t}$ ). We can write  $T_{O'_0}^{C'_t} = (T_W^{O'_0})^{-1} T_W^{C'_t}$  and  
 1091  $T_{O_0}^{C_t} = (T_W^{O_0})^{-1} T_W^{C_t}$ . Setting them equal, we have

$$(T_W^{O'_0})^{-1} T_W^{C'_t} = (T_W^{O_0})^{-1} T_W^{C_t}$$

1092 Rearranging for  $T_W^{C'_t}$  by left-multiplying by  $T_W^{O'_0}$  we obtain

$$T_W^{C'_t} = T_W^{O_0} (T_W^{O'_0})^{-1} T_W^{C_t}$$

1093 which is the equation we use to transform the source segment.

## 1094 M Data Generation Details

1095 In this section, we provide additional details on how MimicGen generates data. We first provide  
 1096 additional details about components of MimicGen that were not discussed in the main text.  
 1097 This includes further discussion on how MimicGen converts between delta-pose actions and controller  
 1098 target poses (Appendix M.1), more details on how interpolation segments are generated (Appendix  
 1099 M.2), an overview of different ways the reference segment can be selected (Appendix M.3),  
 1100 details on how transformed trajectories are executed with action noise (Appendix M.4), additional  
 1101 details on our pipeline for mobile manipulation tasks (Appendix M.5), and finally, a list of the data  
 1102 generation hyperparameters for each task (Appendix M.6).

### 1103 M.1 Equivalence between delta-pose actions and controller target poses

1104 We assume that the action space  $\mathcal{A}$  consists of delta-pose commands for an end effector controller  
 1105 (Assumption 1, Sec. 2). As in [7], we assume that actions are 7-dimensional, where the first 3  
 1106 components are the desired translation from the current end effector position, the next 3 components  
 1107 represent the desired delta rotation from the current end effector rotation, and the final component  
 1108 is the gripper open/close action. The delta rotation is represented in axis-angle form, where the  
 1109 magnitude of the 3-vector gives the angle, and the unit vector gives the axis. The robot controller  
 1110 converts the delta-pose action into an absolute pose target  $T_W^C$  by adding the delta translation to the  
 1111 current end effector position, and applying the delta rotation to the current end effector rotation.

1112 Consequently, at each timestep in a demonstration  $\{s_t, a_t\}_{t=1}^T$ , it is possible to convert each action  
 1113  $a_t$  to a controller pose target  $T_W^{C_t}$  by using the end effector pose at each timestep. MimicGen  
 1114 uses this to represent each segment in the source demonstration as a sequence of controller poses.  
 1115 MimicGen also uses this conversion to execute a new transformed segment during data generation  
 1116 — it converts the sequence of controller poses in the segment to a delta-pose action at each timestep  
 1117 during execution, using the current end effector position.

### 1118 M.2 Details on Interpolation Segments

1119 As mentioned in Sec. 3.2, MimicGen adds an interpolation segment at the start of each transformed  
 1120 segment during data generation to interpolate from the current end effector pose  $T_W^{E'_0}$  and the start of  
 1121 the transformed segment  $T_W^{C'_0}$ . There are two relevant hyperparameters for the interpolation segment  
 1122 in each subtask segment —  $n_{\text{interp}}$  and  $n_{\text{fixed}}$ . We first use simple linear interpolation between the  
 1123 two poses (linear in position, and spherical linear interpolation for rotation) to add  $n_{\text{interp}}$  intermediate  
 1124 controller poses between  $T_W^{E'_0}$  and  $T_W^{C'_0}$ , and then we hold  $T_W^{C'_0}$  fixed for  $n_{\text{fixed}}$  steps. These  
 1125 intermediate poses are all added to the start of the transformed segment, and given to MimicGen to  
 1126 execute one by one.

### 1127 M.3 Reference Segment Selection

1128 Recall that MimicGen parses the source dataset into segments that correspond to each subtask  
 1129  $\mathcal{D}_{\text{src}} = \{(\tau_1^j, \tau_2^j, \dots, \tau_M^j)\}_{j=1}^N$  (Sec. 3.1). During data generation, at the start of each subtask  $S_i(o_{S_i})$ ,  
 1130 MimicGen must choose a corresponding segment from the set  $\{\tau_i^j\}_{j=1}^N$  of  $N$  subtask segments in  
 1131  $\mathcal{D}_{\text{src}}$ . It suffices to choose only one source demonstration  $j \in \{1, 2, \dots, N\}$  since this uniquely identifies  
 1132 the subtask segment for the current subtask. We discuss some variants of how this selection  
 1133 occurs.

1134 **Selection Frequency.** As presented in the main text (Fig. 2), MimicGen can select a source demonstration  
 1135  $j$  (and corresponding segment) at the start of each subtask. However, in many cases, this  
 1136 can be undesirable, since different demonstrations might have used different strategies that are incompatible  
 1137 with each other. As an example, two demonstrations might have different object grasps  
 1138 for the mug in Fig. 2 — each grasp might require a different placement strategy. Consequently,  
 1139 we introduce a hyperparameter, **per-subtask**, which can toggle this behavior — if it is set to False,  
 1140 MimicGen chooses a single source demonstration  $j$  at the start of a data generation episode and  
 1141 holds it fixed (so all source subtask segments are from the same demonstration,  $(\tau_1^j, \tau_2^j, \dots, \tau_M^j)$ ).

| Task                    | D <sub>0</sub> | D <sub>0</sub> (no noise) | D <sub>1</sub> | D <sub>1</sub> (no noise) | D <sub>2</sub> | D <sub>1</sub> (no noise) |
|-------------------------|----------------|---------------------------|----------------|---------------------------|----------------|---------------------------|
| Square (DGR)            | 73.7           | 80.5                      | 48.9           | 50.7                      | 31.8           | 33.4                      |
| Threading (DGR)         | 51.0           | 84.5                      | 39.2           | 50.8                      | 21.6           | 27.3                      |
| Square (SR, low-dim)    | 98.0 ± 1.6     | 82.0 ± 1.6                | 80.7 ± 3.4     | 70.0 ± 1.6                | 58.7 ± 1.9     | 55.3 ± 1.9                |
| Threading (SR, low-dim) | 97.3 ± 0.9     | 69.3 ± 0.9                | 72.0 ± 1.6     | 56.7 ± 5.0                | 60.7 ± 6.2     | 46.0 ± 7.5                |
| Square (SR, image)      | 90.7 ± 1.9     | 72.0 ± 3.3                | 73.3 ± 3.4     | 56.7 ± 0.9                | 49.3 ± 2.5     | 42.7 ± 6.6                |
| Threading (SR, image)   | 98.0 ± 1.6     | 59.3 ± 6.8                | 60.7 ± 2.5     | 43.3 ± 9.3                | 38.0 ± 3.3     | 22.7 ± 0.9                |

Table M.1: **Effect of Removing Action Noise.** MimicGen adds Gaussian noise to actions when executing transformed segments during data generation. These results show that removing the noise can increase the data generation rate (as expected), but can cause agent performance to decrease significantly.

| Task                                 | normal      | no NN      | no per-subtask | no NN + no per-subtask |
|--------------------------------------|-------------|------------|----------------|------------------------|
| Square ( $D_0$ ) (DGR)               | 73.7        | 36.7       | -              | -                      |
| Square ( $D_1$ ) (DGR)               | 48.9        | 30.6       | -              | -                      |
| Square ( $D_2$ ) (DGR)               | 31.8        | 22.4       | -              | -                      |
| Nut Assembly ( $D_0$ ) (DGR)         | 50.0        | 27.1       | -              | -                      |
| Stack ( $D_0$ ) (DGR)                | 94.3        | -          | 85.1           | 71.6                   |
| Stack ( $D_1$ ) (DGR)                | 90.0        | -          | 76.3           | 63.3                   |
| Stack Three ( $D_0$ ) (DGR)          | 71.3        | -          | 37.8           | 26.7                   |
| Stack Three ( $D_1$ ) (DGR)          | 68.9        | -          | 36.0           | 27.5                   |
| Pick Place ( $D_0$ ) (DGR)           | 32.7        | -          | 30.8           | 29.7                   |
| Square ( $D_0$ ) (SR, low-dim)       | 98.0 ± 1.6  | 94.7 ± 2.5 | -              | -                      |
| Square ( $D_1$ ) (SR, low-dim)       | 80.7 ± 3.4  | 79.3 ± 2.5 | -              | -                      |
| Square ( $D_2$ ) (SR, low-dim)       | 58.7 ± 1.9  | 57.3 ± 0.9 | -              | -                      |
| Nut Assembly ( $D_0$ ) (SR, low-dim) | 76.0 ± 1.6  | 64.7 ± 5.7 | -              | -                      |
| Stack ( $D_0$ ) (SR, low-dim)        | 100.0 ± 0.0 | -          | 99.3 ± 0.9     | 99.3 ± 0.9             |
| Stack ( $D_1$ ) (SR, low-dim)        | 100.0 ± 0.0 | -          | 100.0 ± 0.0    | 99.3 ± 0.9             |
| Stack Three ( $D_0$ ) (SR, low-dim)  | 88.0 ± 1.6  | -          | 84.0 ± 1.6     | 81.3 ± 2.5             |
| Stack Three ( $D_1$ ) (SR, low-dim)  | 90.7 ± 0.9  | -          | 78.7 ± 2.5     | 83.3 ± 0.9             |
| Pick Place ( $D_0$ ) (SR, low-dim)   | 58.7 ± 7.5  | -          | 52.0 ± 3.3     | 56.0 ± 5.9             |

Table M.2: **Effect of Removing Selection Strategy.** Some of our tasks used a nearest-neighbor selection strategy and a per-subtask selection strategy for source demonstration segments. These results show the effect of removing these selection strategies (e.g. using the default, random selection strategy). Interestingly, while the data generation rates decrease significantly, agent performance does not decrease significantly for most tasks.

The **per-subtask** hyperparameter determines how frequently source demonstration selection occurs — we next discuss strategies for actually selecting the source demonstration.

**Selection Strategy.** We now turn to how the source demonstration  $j$  is selected. We found **random** selection to be a simple and effective strategy in many cases — here, we simply select the source demonstration  $j$  uniformly at random from  $\{1, 2, \dots, N\}$ . We used this strategy for most of our tasks. However, we found some tasks benefit from a **nearest-neighbor** selection strategy. Consider selecting a source demonstration segment for subtask  $S_i(o_{S_i})$ . We compare the pose  $T_W^{O'_i}$  of object  $o_{S_i}$  in the current scene with the initial object pose  $T_W^{O_0}$  at the start of each source demonstration segment  $\tau_i^j$ , and sort the demonstrations (ascending) according to the pose distance (to evaluate the pose distance for each demonstration segment, we sum the  $L_2$  position distance with the angle value of the delta rotation (in axis-angle form) between the two object rotations). We then select a demonstration uniformly at random from the first  $nm_k$  members of the sorted list.

#### M.4 Action Noise

When MimicGen executes a transformed segment during data generation, it converts the sequence of target poses into delta-pose actions  $a_t$  at each timestep. We found it beneficial to apply additive noise to these actions — we apply Gaussian noise  $\mathcal{N}(0, 1)$  in each dimension (excluding gripper actuation) with magnitude  $\sigma$ . To showcase the value of including the noise we ran an ablation experiment (presented in Table M.1) that shows how much data generation success rate and agent performance

1160 changes when the datasets are not generated with action noise during execution (compared to our  
1161 default value of  $\sigma = 0.05$ ).

1162 As expected, the data generation success rate increases when using no noise, as noise can cause the  
1163 end effector motion to deviate from the expected subtask segment that is being followed (the most  
1164 significant example is an increase of 33% on Threading  $D_0$ ). However, agent performance suffers,  
1165 with performance drops as large as 30% on agents trained on low-dim observations, and up to 40%  
1166 on agents trained on image observations.

## 1167 M.5 Data Generation for Mobile Manipulation Tasks

1168 The process of transforming source segments differs slightly for mobile manipulation tasks. A  
1169 source segment may or may not contain mobile base actions. If the segment does not contain mobile  
1170 base actions we generate segments in the same manner as our method for manipulator-only environ-  
1171 ments. If a segment does contain mobile base actions we assume that the segment can be split into  
1172 three contiguous sub-segments: (1) a sub-segment involving manipulator actions, (2) a subsequent  
1173 sub-segment involving mobile base actions, and (3) a final sub-segment involving manipulator ac-  
1174 tions. We generate corresponding sub-segments for each of these phases. We generate sub-segments  
1175 for (1) and (3) in the same manner as our algorithm for manipulator-only environments, and we gen-  
1176 erate sub-segment (2) by simply copying the mobile base actions from the reference sub-segment.  
1177 We found this scheme to work sufficiently well for the mobile manipulation task in this work, but  
1178 future work improve the generation of sub-segment (2) (the robot base movement) to account for  
1179 different environment layouts in a scene, by defining and using a reference frame for each base  
1180 motion segment, like the object-centric subtasks used for arm actions, and/or integrating a motion  
1181 planner for the base. We highlight the limitations of our approach in Appendix C.

## 1182 M.6 MimicGen Hyperparameters

1183 In this section, we summarize the data generation hyperparameters (defined above) used for each  
1184 task. As several tasks had the same settings, we group tasks together wherever possible.

1185 **Default.** Most of our tasks used a noise scale of  $\sigma = 0.05$ , interpolation steps of  $n_{\text{interp}} = 5$ ,  
1186  $n_{\text{fixed}} = 0$ , and a selection strategy of **random** with **per-subtask** set to False. These tasks include  
1187 Threading, Coffee, Three Piece Assembly, Hammer Cleanup, Mug Cleanup, Kitchen, Coffee Prepa-  
1188 ration, Mobile Kitchen, Nut-and-Bolt Assembly, Gear Assembly, and Frame Assembly.

1189 **Nearest-Neighbor and Per-Subtask.** Some of our tasks used the default values above, with the ex-  
1190 ception of using a **nearest-neighbor** selection strategy. The following tasks used **nearest-neighbor**  
1191 ( $nn_k = 3$ ) with **per-subtask** set to False: Square and Nut Assembly. Some tasks used **nearest-**  
1192 **neighbor** ( $nn_k = 3$ ) with **per-subtask** set to True: Stack, Stack Three, Pick Place. In general, we  
1193 found **per-subtask** selection to help for pick-and-place tasks. To showcase the value of using these  
1194 specific selection strategies, we ran an ablation experiment (presented in Table M.2) that shows how  
1195 much data generation success rate and agent performance changes when turning these strategies off  
1196 during data generation. Interestingly, while the data generation rates decrease significantly, agent  
1197 performance does not decrease significantly for most tasks.

1198 **Real.** Our real robot tasks used different settings for safety considerations, and to ensure that data  
1199 could be collected in a timely manner (maintain high data generation rate). All tasks used a reduced  
1200 noise scale of  $\sigma = 0.02$ , and higher interpolation steps of  $n_{\text{interp}} = 25$ ,  $n_{\text{fixed}} = 25$ . The Stack  
1201 task used a selection strategy of **nearest-neighbor** ( $nn_k = 3$ ) with **per-subtask** set to True, and  
1202 the Coffee task used a selection strategy of **random** with **per-subtask** set to False, just like their  
1203 simulation counterparts.



## 1204 N Policy Training Details

1205 We describe details of how policies were trained via imitation learning. Several design choices are  
1206 the same as the robomimic study [7].

1207 **Observation Spaces.** As in robomimic [7], we train policies on two observation spaces — “low-  
1208 dim” and “image”. While both include end effector poses and gripper finger positions, “low-dim”  
1209 includes ground-truth object poses, while “image” includes camera observations from a front-view  
1210 camera and a wrist-view camera. All tasks use images with 84x84 resolution with the exception of  
1211 the real world tasks (Stack, Coffee), which use an increased resolution of 120x160. For “image”  
1212 agents, we apply pixel shift randomization [7, 28–31] and shift image pixels by up to 10% of each  
1213 dimension each time observations are provided to the agent.

1214 **Training Hyperparameters.** We use BC-RNN from robomimic [7] with the default hyperparam-  
1215 eters reported in their study, with the exception of an increased learning rate (1e-3 instead of 1e-4)  
1216 for policies trained on low-dim observations, as we found it to speed up policy convergence on large  
1217 datasets.

1218 **Policy Evaluation.** As in [7], on simulation tasks, we evaluate policies using 50 rollouts per agent  
1219 checkpoint during training, and report the maximum success rate achieved by each agent across 3  
1220 seeds. On the real world tasks, due to the time-consuming nature of policy evaluation, we take the  
1221 last policy checkpoint produced during training, and evaluate it over 50 episodes.



## 1222 O Data Generation Success Rates

1223 In this section, we present data generation success rates for each of our generated datasets. Comparing the results in Table O.1 with our core image-based agent results (Fig. 4) and low-dim agent results (Table P.1), we see that in many cases the agent performance is much higher than the data generation success rate. An extreme example is the Gear Assembly task which has data generation rates of 46.9% ( $D_0$ ), 8.2% ( $D_1$ ), and 7.1% ( $D_2$ ) but policy success rates of 92.7% ( $D_0$ ), 76.0% ( $D_1$ ), and 64.0% ( $D_2$ ). We also saw much higher agent performance than the data generation rate in our robot transfer experiment (see Appendix E).

| Task                  | $D_0$ | $D_1$ | $D_2$ |
|-----------------------|-------|-------|-------|
| Stack                 | 94.3  | 90.0  | -     |
| Stack Three           | 71.3  | 68.9  | -     |
| Square                | 73.7  | 48.9  | 31.8  |
| Threading             | 51.0  | 39.2  | 21.6  |
| Coffee                | 78.2  | 63.5  | 27.7  |
| Three Pc. Assembly    | 35.6  | 35.5  | 31.3  |
| Hammer Cleanup        | 47.6  | 20.4  | -     |
| Mug Cleanup           | 29.5  | 17.0  | -     |
| Kitchen               | 100.0 | 42.7  | -     |
| Nut Assembly          | 50.0  | -     | -     |
| Pick Place            | 32.7  | -     | -     |
| Coffee Preparation    | 53.2  | 36.1  | -     |
| Mobile Kitchen        | 20.7  | -     | -     |
| Nut-and-Bolt Assembly | 66.0  | 59.4  | 47.6  |
| Gear Assembly         | 46.9  | 8.2   | 7.1   |
| Frame Assembly        | 45.3  | 32.7  | 28.9  |

Table O.1: **Data Generation Rates.** For each task that we generated data for, we report the data generation rate (DGR) — which is the success rate of the data generation process (recall that not all data generation attempts are successful, and MimicGen only keeps the attempts that result in task success). Comparing with Table P.1 and Fig. 4, we can see that several tasks have significantly higher policy learning performance than data generation rates.

## 1230 P Low-Dim Policy Training Results

1231 In the main text we focused on *image* observation spaces. In this section we present full results  
 1232 for agents trained on *low-dim* observation spaces and show that these agents are equally perform-  
 1233 mant. Results on our main generated datasets are shown in Table P.1 (and can be compared to the  
 1234 image-based agent results in Fig. 4), and the source dataset size comparison and policy training data  
 1235 comparisons are shown in Fig. P.1 (and can be compared to Fig. 4).

| Task                  | Source     | D <sub>0</sub> | D <sub>1</sub> | D <sub>2</sub> |
|-----------------------|------------|----------------|----------------|----------------|
| Stack                 | 38.7 ± 4.1 | 100.0 ± 0.0    | 100.0 ± 0.0    | -              |
| Stack Three           | 2.7 ± 0.9  | 88.0 ± 1.6     | 90.7 ± 0.9     | -              |
| Square                | 18.7 ± 0.9 | 98.0 ± 1.6     | 80.7 ± 3.4     | 58.7 ± 1.9     |
| Threading             | 9.3 ± 2.5  | 97.3 ± 0.9     | 72.0 ± 1.6     | 60.7 ± 6.2     |
| Coffee                | 42.7 ± 4.1 | 100.0 ± 0.0    | 93.3 ± 2.5     | 76.7 ± 0.9     |
| Three Pc. Assembly    | 2.7 ± 0.9  | 74.7 ± 3.8     | 61.3 ± 1.9     | 38.7 ± 4.1     |
| Hammer Cleanup        | 64.7 ± 4.1 | 100.0 ± 0.0    | 74.0 ± 1.6     | -              |
| Mug Cleanup           | 8.0 ± 1.6  | 82.0 ± 2.8     | 54.7 ± 5.0     | -              |
| Kitchen               | 43.3 ± 3.4 | 100.0 ± 0.0    | 78.0 ± 2.8     | -              |
| Nut Assembly          | 0.0 ± 0.0  | 76.0 ± 1.6     | -              | -              |
| Pick Place            | 0.0 ± 0.0  | 58.7 ± 7.5     | -              | -              |
| Coffee Preparation    | 2.0 ± 0.0  | 76.0 ± 5.7     | 59.3 ± 3.4     | -              |
| Mobile Kitchen        | 6.7 ± 3.8  | 76.7 ± 10.5    | -              | -              |
| Nut-and-Bolt Assembly | 2.0 ± 0.0  | 98.0 ± 1.6     | 96.0 ± 1.6     | 81.3 ± 3.8     |
| Gear Assembly         | 12.0 ± 1.6 | 92.7 ± 1.9     | 76.0 ± 4.9     | 64.0 ± 3.3     |
| Frame Assembly        | 9.3 ± 3.4  | 87.3 ± 2.5     | 70.7 ± 1.9     | 58.0 ± 5.7     |

Table P.1: **Low-Dim Agent Performance on Source and Generated Datasets.** For each task, we present the success rates (3 seeds) of low-dim agents trained with BC on the 10 source demos and on each MimicGen dataset (1000 demos for each reset distribution). There is a large improvement across all tasks on the default distribution ( $D_0$ ) and agents are performant on the broader distributions ( $D_1$ ,  $D_2$ ).

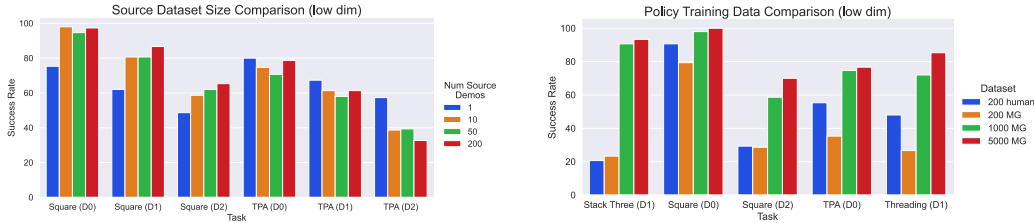

Figure P.1: (left) **MimicGen with more source human demonstrations.** We found that using larger source datasets to generate MimicGen data did not result in significant low-dim agent improvement. (right) **Policy Training Dataset Comparison.** We compare agents trained on 200 MimicGen demos to 200 human demos — remarkably, the performance is similar, despite MimicGen only using 10 source human demos. MimicGen can also produce improved low-dim agents by generating datasets — we show a comparison between 200, 1000, and 5000 above. However, there can be diminishing returns.

## Q Bias and Artifacts in Generated Data

In this section, we discuss some undesirable properties of the generated data.

**Are datasets generated by MimicGen biased towards certain scene configurations?** This is a natural question to ask, since MimicGen keeps trying to re-use the same small set of human demonstrations on new scenes and only retains the successful traces. Indeed, there might be a limited set of scene configurations where data generation works successfully, and some scene configurations that are never included in the generated data. We conduct an initial investigation into whether such bias exists by analyzing the set of initial states in a subset of our generated datasets. Specifically, we take inspiration from [75], and discretize the set of possible object placements for each object in each task into bins. Then, we simply maintain bin counts by taking the initial object placements for each episode in a generated dataset, computing the bin it belongs to, and updating the bin count. Finally, we estimate the *support coverage* of the reset distribution by counting the number of non-zero bins and dividing by the total number of bins.

As a concrete example, consider the Threading  $D_1$  variant, where the needle and tripod are both sampled from a region with bounds in  $x$ ,  $y$  and  $\theta$ , where  $\theta$  is a top-down rotation angle (see Fig. 5). If each dimension is discretized into  $n$  independent bins, there are a total of  $n^6$  bins (all combinations of the dimensions). Due to this exponential scaling, we use a small number of bins ( $n = 3$ ). Note that when conducting this analysis, we had to be careful to ensure that the overall bin count was not too small or too large. If it was too small, each bin would correspond to a large section of the object configuration space, and the results would not be meaningful. Similarly, if it was too large, there is no way for 1000 generated demonstrations to cover a meaningful portion of the support (since there can only be 1000 bins covered at best).

We now present our results. For several environments, we found there to be a good amount of support coverage — for example, Coffee  $D_1$  (98.8%), Coffee  $D_2$  (89.3%), and Square  $D_1$  (92.6%). However, we also found datasets that likely have significant amounts of bias — for example, Square  $D_2$  (66.4%), Threading  $D_1$  (71%), Threading  $D_2$  (61.2%), Three Piece Assembly  $D_0$  (67.9%), Three Piece Assembly  $D_1$  (43.5%), and Mug Cleanup  $D_1$  (64%). This analysis is certainly imperfect, as some datasets could still be biased towards containing certain object configurations than others (e.g. having non-uniform bin counts across the support), and there could also be different kinds of bias (such as repetitive motions). However, this analysis does confirm that there is certainly bias in some of the generated datasets. A deeper investigation into the properties of the generated data is left for future work.

**Are there artifacts and other undesirable behavior characteristics in MimicGen datasets?** Artifacts and other undesirable behavior characteristics are likely, for two reasons. One reason is that MimicGen bridges transformed segments from the source dataset with interpolation segments. These interpolation segments could result in long paths and unnatural motions that are difficult to imitate. In fact, we found some evidence of this fact (see Appendix G). Another reason is that MimicGen only checks for a successful task completion when deciding whether to accept a generated trajectory. This means that there might be undesirable behaviors such as collisions between the robot and certain parts of the world (including objects that are not task-relevant). As we move towards deploying robots trained through imitation learning, data curation efforts are of the utmost importance — this is left for future work.

| Task                                            | Source         | $D_0$          | $D_1$          | $D_2$          |
|-------------------------------------------------|----------------|----------------|----------------|----------------|
| Square (src $D_0$ ) (DGR)                       | -              | 73.7           | 48.9           | 31.8           |
| Square (src $D_2$ ) (DGR)                       | -              | 54.4           | 51.7           | 52.3           |
| Three Piece Assembly (src $D_0$ ) (DGR)         | -              | 35.6           | 35.5           | 31.3           |
| Three Piece Assembly (src $D_2$ ) (DGR)         | -              | 26.9           | 29.1           | 23.9           |
| Square (src $D_0$ ) (SR, low-dim)               | $18.7 \pm 0.9$ | $98.0 \pm 1.6$ | $80.7 \pm 3.4$ | $58.7 \pm 1.9$ |
| Square (src $D_2$ ) (SR, low-dim)               | $2.0 \pm 0.0$  | $98.0 \pm 1.6$ | $84.7 \pm 1.9$ | $60.7 \pm 2.5$ |
| Three Piece Assembly (src $D_0$ ) (SR, low-dim) | $2.7 \pm 0.9$  | $74.7 \pm 3.8$ | $61.3 \pm 1.9$ | $38.7 \pm 4.1$ |
| Three Piece Assembly (src $D_2$ ) (SR, low-dim) | $0.0 \pm 0.0$  | $62.0 \pm 4.9$ | $57.3 \pm 4.1$ | $32.0 \pm 2.8$ |

Table R.1: **Using More Varied Source Demonstrations.** We present a comparison of data generation success rates and policy success rates (3 seeds) across two choices of source datasets — the 10 source human demonstrations collected on  $D_0$  (default used in main experiments) and 10 source human demonstrations collected on the significantly more diverse  $D_2$  reset distribution. Interestingly, while the data generation success rates differ, the policy success rates are comparable, suggesting that downstream agent performance can be invariant to how much the task initializations of the source demonstrations vary.

Most of our experiments used 10 source human demonstrations collected on a narrow reset distribution ( $D_0$ ) and generated demonstrations with MimicGen across significantly more varied reset distributions ( $D_0$ ,  $D_1$ ,  $D_2$ ). In this section, we investigate whether having source demonstrations collected on a more varied set of task initializations is helpful. We do this by collecting 10 source human demonstrations on  $D_2$  and using it to generate data for all reset distributions ( $D_0$ ,  $D_1$ ,  $D_2$ ). The results are presented in Table R.1. Interestingly, while the data generation success rates differ, the policy success rates are comparable, suggesting that downstream agent performance can be invariant to how much the task initializations of the source demonstrations vary.

## 1287 S Data Generation with Multiple Seeds

1288 MimicGen’s data generation process has several sources of randomness, including the initial state of  
 1289 objects for each data generation attempt (which is sampled from the reset distribution  $D$ ), selecting  
 1290 the source dataset segment that will be transformed (Appendix M.3), and the noise added to actions  
 1291 during execution (Appendix M.4). In all of our experiments, we only used a single seed to generate  
 1292 datasets (our policy learning results are reported across 3 seeds though). In this section, we justify  
 1293 this decision, by showing that there is very little variance in empirical results across different data  
 1294 generation seeds.

1295 We generated 3 datasets (3 different seeds) for Stack Three ( $D_0, D_1$ ) and Square ( $D_0, D_1, D_2$ ),  
 1296 and train low-dim policies (3 seeds per generated results, so 9 seeds in total per task variant) and  
 1297 summarize the results in Table S.1. The data generation success rates have very tight variance (less  
 1298 than 1%) and do not deviate from our reported data generation rates (Appendix O) by more than  
 1299 0.6%. Furthermore, the mean policy success rates are extremely close to our reported results for  
 1300 low-dim agents in Table P.1 (less than 2% deviation).

| Task              | $D_0$          | $D_1$          | $D_2$          |
|-------------------|----------------|----------------|----------------|
| Stack Three (DGR) | $71.7 \pm 0.3$ | $69.3 \pm 0.4$ | -              |
| Square (DGR)      | $74.4 \pm 0.5$ | $48.5 \pm 0.7$ | $32.0 \pm 0.9$ |
| Stack Three (SR)  | $89.6 \pm 2.1$ | $92.4 \pm 1.6$ | -              |
| Square (SR)       | $96.7 \pm 2.1$ | $81.6 \pm 4.5$ | $58.0 \pm 3.5$ |

Table S.1: **Data Generation with Multiple Seeds.** We present data generation rates (DGR) and success rates (SR) across 3 seeds of data generation, and 3 low-dim policy training seeds per dataset (9 seeds) total. The results are very close to our reported results (less than 0.6% deviation in DGR, less than 2% deviation in SR) despite our results only generating datasets with one seed.

## T Tolerance to Pose Estimation Error

In the main text, we demonstrated that MimicGen is fully functional in real-world settings and can operate with minimal assumptions (e.g. no special tags or pose trackers) by using pose estimation methods (see Appendix G for details). Consequently, the data generation process has some tolerance to pose error and can operate without having access to perfect pose estimates. In this section, we further investigate this tolerance in simulation by adding 2 levels of uniform noise to object poses - L1 is 5 mm position and 5 deg rotation noise and L2 is 10 mm position and 10 deg rotation noise [96]. As shown in Table T.1, the data generation rate decreases (e.g. Square D0 decreases from 73.7% to 60.9% for L1 and 30.5% for L2 and Square D2 decreases from 31.8% to 25.1% for L1 and 14.5% for L2), but visuomotor policy learning results are relatively robust (Square D0 decreases from 90.7% to 89.3% for L1 and 84.7% for L2), and Square D2 decreases from 49.3% to 47.3% for L1 and 39.3% for L2).

| Task                        | None            | Level 1 (5 mm / 5 deg) | Level 2 (10 mm / 10 deg) |
|-----------------------------|-----------------|------------------------|--------------------------|
| Stack Three ( $D_1$ ) (DGR) | 68.9            | 62.3                   | 38.7                     |
| Stack Three ( $D_1$ ) (SR)  | $86.7 \pm 3.4$  | $84.0 \pm 2.8$         | $80.7 \pm 3.4$           |
| Square ( $D_0$ ) (DGR)      | 73.7            | 60.9                   | 30.5                     |
| Square ( $D_1$ ) (DGR)      | 48.9            | 40.2                   | 20.2                     |
| Square ( $D_2$ ) (DGR)      | 31.8            | 25.1                   | 14.5                     |
| Square ( $D_0$ ) (SR)       | $90.7 \pm 1.9$  | $89.3 \pm 2.5$         | $84.7 \pm 2.5$           |
| Square ( $D_1$ ) (SR)       | $73.3 \pm 3.4$  | $64.0 \pm 1.6$         | $62.0 \pm 1.6$           |
| Square ( $D_2$ ) (SR)       | $49.3 \pm 2.5$  | $47.3 \pm 6.8$         | $39.3 \pm 4.7$           |
| Coffee ( $D_0$ ) (DGR)      | 78.2            | 28.9                   | 5.6                      |
| Coffee ( $D_1$ ) (DGR)      | 63.5            | 22.6                   | 4.3                      |
| Coffee ( $D_0$ ) (SR)       | $100.0 \pm 0.0$ | $95.3 \pm 2.5$         | $79.3 \pm 0.9$           |
| Coffee ( $D_1$ ) (SR)       | $90.7 \pm 2.5$  | $83.3 \pm 2.5$         | $77.3 \pm 4.1$           |
| Threading ( $D_0$ ) (DGR)   | 51.0            | 17.6                   | 5.2                      |
| Threading ( $D_0$ ) (SR)    | $98.0 \pm 1.6$  | $94.7 \pm 0.9$         | $86.7 \pm 1.9$           |

Table T.1: **Tolerance to Noisy Pose Estimates.** We investigate how the data generation success rates (DGR) and visuomotor policy success rates (SR) change when adding uniform pose noise to the object poses in the source demonstrations and the new scene during data generation. Although the data generation rates decrease, policy success rates are robust. This shows that MimicGen can be tolerant to noisy object pose estimation, and is suitable for real-world data collection.

## References

- [1] T. Zhang, Z. McCarthy, O. Jow, D. Lee, K. Goldberg, and P. Abbeel, “Deep imitation learning for complex manipulation tasks from virtual reality teleoperation,” *arXiv preprint arXiv:1710.04615*, 2017.
- [2] A. Mandlekar, Y. Zhu, A. Garg, J. Booher, M. Spero, A. Tung, J. Gao, J. Emmons, A. Gupta, E. Orbay, S. Savarese, and L. Fei-Fei, “RoboTurk: A Crowdsourcing Platform for Robotic Skill Learning through Imitation,” in *Conference on Robot Learning*, 2018.
- [3] E. Jang, A. Irpan, M. Khansari, D. Kappler, F. Ebert, C. Lynch, S. Levine, and C. Finn, “Bc-z: Zero-shot task generalization with robotic imitation learning,” in *Conference on Robot Learning*. PMLR, 2022, pp. 991–1002.
- [4] M. Ahn, A. Brohan, N. Brown, Y. Chebotar, O. Cortes, B. David, C. Finn, K. Gopalakrishnan, K. Hausman, A. Herzog *et al.*, “Do as i can, not as i say: Grounding language in robotic affordances,” *arXiv preprint arXiv:2204.01691*, 2022.
- [5] A. Brohan, N. Brown, J. Carbajal, Y. Chebotar, J. Dabis, C. Finn, K. Gopalakrishnan, K. Hausman, A. Herzog, J. Hsu *et al.*, “Rt-1: Robotics transformer for real-world control at scale,” *arXiv preprint arXiv:2212.06817*, 2022.
- [6] F. Ebert, Y. Yang, K. Schmeckpeper, B. Bucher, G. Georgakis, K. Daniilidis, C. Finn, and S. Levine, “Bridge data: Boosting generalization of robotic skills with cross-domain datasets,” *arXiv preprint arXiv:2109.13396*, 2021.
- [7] A. Mandlekar, D. Xu, J. Wong, S. Nasiriany, C. Wang, R. Kulkarni, L. Fei-Fei, S. Savarese, Y. Zhu, and R. Martín-Martín, “What matters in learning from offline human demonstrations for robot manipulation,” in *Conference on Robot Learning (CoRL)*, 2021.
- [8] B. Wen, W. Lian, K. Bekris, and S. Schaal, “You only demonstrate once: Category-level manipulation from single visual demonstration,” in *Robotics: Science and Systems (RSS)*, 2022.
- [9] E. Johns, “Coarse-to-Fine Imitation Learning: Robot Manipulation from a Single Demonstration,” *ICRA*, 2021.
- [10] E. Valassakis, G. Papagiannis, N. Di Palo, and E. Johns, “Demonstrate once, imitate immediately (dome): Learning visual servoing for one-shot imitation learning,” in *2022 IEEE/RSJ International Conference on Intelligent Robots and Systems (IROS)*. IEEE, 2022, pp. 8614–8621.
- [11] N. Di Palo and E. Johns, “Learning multi-stage tasks with one demonstration via self-replay,” in *Conference on Robot Learning*. PMLR, 2022, pp. 1180–1189.
- [12] S. Levine, P. Pastor, A. Krizhevsky, and D. Quillen, “Learning hand-eye coordination for robotic grasping with large-scale data collection,” in *ISER*, 2016, pp. 173–184.
- [13] L. Pinto and A. Gupta, “Supersizing self-supervision: Learning to grasp from 50k tries and 700 robot hours,” in *Robotics and Automation (ICRA), 2016 IEEE Int’l Conference on*. IEEE, 2016.
- [14] D. Kalashnikov, A. Irpan, P. Pastor, J. Ibarz, A. Herzog, E. Jang, D. Quillen, E. Holly, M. Kalakrishnan, V. Vanhoucke *et al.*, “Qt-opt: Scalable deep reinforcement learning for vision-based robotic manipulation,” *arXiv preprint arXiv:1806.10293*, 2018.
- [15] D. Kalashnikov, J. Varley, Y. Chebotar, B. Swanson, R. Jonschkowski, C. Finn, S. Levine, and K. Hausman, “Mt-opt: Continuous multi-task robotic reinforcement learning at scale,” *arXiv preprint arXiv:2104.08212*, 2021.
- [16] K.-T. Yu, M. Bauza, N. Fazeli, and A. Rodriguez, “More than a million ways to be pushed. a high-fidelity experimental dataset of planar pushing,” in *Int’l Conference on Intelligent Robots and Systems*, 2016.
- [17] S. Dasari, F. Ebert, S. Tian, S. Nair, B. Bucher, K. Schmeckpeper, S. Singh, S. Levine, and C. Finn, “Robonet: Large-scale multi-robot learning,” *arXiv preprint arXiv:1910.11215*, 2019.
- [18] A. Mandlekar, J. Booher, M. Spero, A. Tung, A. Gupta, Y. Zhu, A. Garg, S. Savarese, and L. Fei-Fei, “Scaling robot supervision to hundreds of hours with roboturk: Robotic manipulation dataset through human reasoning and dexterity,” *arXiv preprint arXiv:1911.04052*, 2019.



- [19] A. Mandlekar, D. Xu, R. Martín-Martín, Y. Zhu, L. Fei-Fei, and S. Savarese, “Human-in-the-loop imitation learning using remote teleoperation,” *arXiv preprint arXiv:2012.06733*, 2020.
- [20] A. Tung, J. Wong, A. Mandlekar, R. Martín-Martín, Y. Zhu, L. Fei-Fei, and S. Savarese, “Learning multi-arm manipulation through collaborative teleoperation,” *arXiv preprint arXiv:2012.06738*, 2020.
- [21] J. Wong, A. Tung, A. Kurenkov, A. Mandlekar, L. Fei-Fei, S. Savarese, and R. Martín-Martín, “Error-aware imitation learning from teleoperation data for mobile manipulation,” in *Conference on Robot Learning*. PMLR, 2022, pp. 1367–1378.
- [22] C. Lynch, A. Wahid, J. Tompson, T. Ding, J. Betker, R. Baruch, T. Armstrong, and P. Florence, “Interactive language: Talking to robots in real time,” *arXiv preprint arXiv:2210.06407*, 2022.
- [23] J. Zhang and K. Cho, “Query-efficient imitation learning for end-to-end autonomous driving,” *arXiv preprint arXiv:1605.06450*, 2016.
- [24] R. Hoque, A. Balakrishna, C. Putterman, M. Luo, D. S. Brown, D. Seita, B. Thananjeyan, E. Novoseller, and K. Goldberg, “Lazydagger: Reducing context switching in interactive imitation learning,” in *2021 IEEE 17th International Conference on Automation Science and Engineering (CASE)*. IEEE, 2021, pp. 502–509.
- [25] R. Hoque, A. Balakrishna, E. Novoseller, A. Wilcox, D. S. Brown, and K. Goldberg, “Thriftydagger: Budget-aware novelty and risk gating for interactive imitation learning,” *arXiv preprint arXiv:2109.08273*, 2021.
- [26] S. Dass, K. Pertsch, H. Zhang, Y. Lee, J. J. Lim, and S. Nikolaidis, “Pato: Policy assisted teleoperation for scalable robot data collection,” *arXiv preprint arXiv:2212.04708*, 2022.
- [27] P. Mitrano and D. Berenson, “Data augmentation for manipulation,” *arXiv preprint arXiv:2205.02886*, 2022.
- [28] M. Laskin, K. Lee, A. Stooke, L. Pinto, P. Abbeel, and A. Srinivas, “Reinforcement learning with augmented data,” *arXiv preprint arXiv:2004.14990*, 2020.
- [29] I. Kostrikov, D. Yarats, and R. Fergus, “Image augmentation is all you need: Regularizing deep reinforcement learning from pixels,” *arXiv preprint arXiv:2004.13649*, 2020.
- [30] S. Young, D. Gandhi, S. Tulsiani, A. Gupta, P. Abbeel, and L. Pinto, “Visual imitation made easy,” *arXiv e-prints*, pp. arXiv–2008, 2020.
- [31] A. Zhan, P. Zhao, L. Pinto, P. Abbeel, and M. Laskin, “A framework for efficient robotic manipulation,” *arXiv preprint arXiv:2012.07975*, 2020.
- [32] S. Pitis, E. Creager, and A. Garg, “Counterfactual data augmentation using locally factored dynamics,” *Advances in Neural Information Processing Systems*, vol. 33, pp. 3976–3990, 2020.
- [33] S. Pitis, E. Creager, A. Mandlekar, and A. Garg, “Mocoda: Model-based counterfactual data augmentation,” *arXiv preprint arXiv:2210.11287*, 2022.
- [34] Z. Mandi, H. Bharadhwaj, V. Moens, S. Song, A. Rajeswaran, and V. Kumar, “Cacti: A framework for scalable multi-task multi-scene visual imitation learning,” *arXiv preprint arXiv:2212.05711*, 2022.
- [35] T. Yu, T. Xiao, A. Stone, J. Tompson, A. Brohan, S. Wang, J. Singh, C. Tan, J. Peralta, B. Ichter *et al.*, “Scaling robot learning with semantically imagined experience,” *arXiv preprint arXiv:2302.11550*, 2023.
- [36] Z. Chen, S. Kiani, A. Gupta, and V. Kumar, “Genaug: Retargeting behaviors to unseen situations via generative augmentation,” *arXiv preprint arXiv:2302.06671*, 2023.
- [37] Y. Zhang, H. Ling, J. Gao, K. Yin, J.-F. Lafleche, A. Barriuso, A. Torralba, and S. Fidler, “Datasetgan: Efficient labeled data factory with minimal human effort,” in *Proceedings of the IEEE/CVF Conference on Computer Vision and Pattern Recognition*, 2021, pp. 10 145–10 155.
- [38] D. Li, H. Ling, S. W. Kim, K. Kreis, S. Fidler, and A. Torralba, “Bigdatasetgan: Synthesizing imagenet with pixel-wise annotations,” in *Proceedings of the IEEE/CVF Conference on Computer Vision and Pattern Recognition*, 2022, pp. 21 330–21 340.
- [39] A. Kar, A. Prakash, M.-Y. Liu, E. Cameracci, J. Yuan, M. Rusiniak, D. Acuna, A. Torralba, and S. Fidler, “Meta-sim: Learning to generate synthetic datasets,” in *Proceedings of the IEEE/CVF International Conference on Computer Vision*, 2019, pp. 4551–4560.

- [40] J. Devaranjan, A. Kar, and S. Fidler, “Meta-sim2: Unsupervised learning of scene structure for synthetic data generation,” in *Computer Vision—ECCV 2020: 16th European Conference, Glasgow, UK, August 23–28, 2020, Proceedings, Part XVII 16*. Springer, 2020, pp. 715–733.
- [41] S. W. Kim, J. Philion, A. Torralba, and S. Fidler, “Drivegan: Towards a controllable high-quality neural simulation,” in *Proceedings of the IEEE/CVF Conference on Computer Vision and Pattern Recognition*, 2021, pp. 5820–5829.
- [42] D. Paschalidou, A. Kar, M. Shugrina, K. Kreis, A. Geiger, and S. Fidler, “Atiss: Autoregressive transformers for indoor scene synthesis,” *Advances in Neural Information Processing Systems*, vol. 34, pp. 12 013–12 026, 2021.
- [43] S. Tan, K. Wong, S. Wang, S. Manivasagam, M. Ren, and R. Urtasun, “Scenegen: Learning to generate realistic traffic scenes,” in *Proceedings of the IEEE/CVF Conference on Computer Vision and Pattern Recognition*, 2021, pp. 892–901.
- [44] D. A. Pomerleau, “Alvinn: An autonomous land vehicle in a neural network,” in *Advances in neural information processing systems*, 1989, pp. 305–313.
- [45] A. J. Ijspeert, J. Nakanishi, and S. Schaal, “Movement imitation with nonlinear dynamical systems in humanoid robots,” *Proceedings 2002 IEEE International Conference on Robotics and Automation*, vol. 2, pp. 1398–1403 vol.2, 2002.
- [46] C. Finn, T. Yu, T. Zhang, P. Abbeel, and S. Levine, “One-shot visual imitation learning via meta-learning,” in *Conference on robot learning*. PMLR, 2017, pp. 357–368.
- [47] A. Billard, S. Calinon, R. Dillmann, and S. Schaal, “Robot programming by demonstration,” in *Springer Handbook of Robotics*, 2008.
- [48] S. Calinon, F. D’halluin, E. L. Sauser, D. G. Caldwell, and A. Billard, “Learning and reproduction of gestures by imitation,” *IEEE Robotics and Automation Magazine*, vol. 17, pp. 44–54, 2010.
- [49] A. Mandlekar, D. Xu, R. Martín-Martín, S. Savarese, and L. Fei-Fei, “Learning to generalize across long-horizon tasks from human demonstrations,” *arXiv preprint arXiv:2003.06085*, 2020.
- [50] A. Zeng, P. Florence, J. Tompson, S. Welker, J. Chien, M. Attarian, T. Armstrong, I. Krasin, D. Duong, V. Sindhwani *et al.*, “Transporter networks: Rearranging the visual world for robotic manipulation,” *arXiv preprint arXiv:2010.14406*, 2020.
- [51] C. Wang, R. Wang, D. Xu, A. Mandlekar, L. Fei-Fei, and S. Savarese, “Generalization through hand-eye coordination: An action space for learning spatially-invariant visuomotor control,” *arXiv preprint arXiv:2103.00375*, 2021.
- [52] V. Vosylius and E. Johns, “Where to start? transferring simple skills to complex environments,” *arXiv preprint arXiv:2212.06111*, 2022.
- [53] A. Chenu, O. Serris, O. Sigaud, and N. Perrin-Gilbert, “Leveraging sequentiality in reinforcement learning from a single demonstration,” *arXiv preprint arXiv:2211.04786*, 2022.
- [54] J. Liang, B. Wen, K. Bekris, and A. Boularias, “Learning sensorimotor primitives of sequential manipulation tasks from visual demonstrations,” in *2022 International Conference on Robotics and Automation (ICRA)*. IEEE, 2022, pp. 8591–8597.
- [55] Y. Zhu, J. Wong, A. Mandlekar, and R. Martín-Martín, “robosuite: A modular simulation framework and benchmark for robot learning,” in *arXiv preprint arXiv:2009.12293*, 2020.
- [56] E. Todorov, T. Erez, and Y. Tassa, “Mujoco: A physics engine for model-based control,” in *IEEE/RSJ International Conference on Intelligent Robots and Systems*, 2012, pp. 5026–5033.
- [57] Y. Narang, K. Storey, I. Akinola, M. Macklin, P. Reist, L. Wawrzyniak, Y. Guo, A. Moravanszky, G. State, M. Lu *et al.*, “Factory: Fast contact for robotic assembly,” *arXiv preprint arXiv:2205.03532*, 2022.
- [58] V. Makoviychuk, L. Wawrzyniak, Y. Guo, M. Lu, K. Storey, M. Macklin, D. Hoeller, N. Rudin, A. Allshire, A. Handa *et al.*, “Isaac gym: High performance gpu-based physics simulation for robot learning,” *arXiv preprint arXiv:2108.10470*, 2021.
- [59] Y. Zhu, P. Stone, and Y. Zhu, “Bottom-up skill discovery from unsegmented demonstrations for long-horizon robot manipulation,” *IEEE Robotics and Automation Letters*, vol. 7, no. 2, pp. 4126–4133, 2022.

- [60] X. B. Peng, M. Andrychowicz, W. Zaremba, and P. Abbeel, “Sim-to-real transfer of robotic control with dynamics randomization,” in *2018 IEEE international conference on robotics and automation (ICRA)*. IEEE, 2018, pp. 3803–3810.
- [61] M. Kaspar, J. D. M. Osorio, and J. Bock, “Sim2real transfer for reinforcement learning without dynamics randomization,” in *2020 IEEE/RSJ International Conference on Intelligent Robots and Systems (IROS)*. IEEE, 2020, pp. 4383–4388.
- [62] A. Allshire, M. Mittal, V. Lodaya, V. Makoviychuk, D. Makoviichuk, F. Widmaier, M. Wüthrich, S. Bauer, A. Handa, and A. Garg, “Transferring dexterous manipulation from gpu simulation to a remote real-world trifinger,” in *2022 IEEE/RSJ International Conference on Intelligent Robots and Systems (IROS)*. IEEE, 2022, pp. 11 802–11 809.
- [63] M. Khansari, D. Ho, Y. Du, A. Fuentes, M. Bennice, N. Sievers, S. Kirmani, Y. Bai, and E. Jang, “Practical imitation learning in the real world via task consistency loss,” *arXiv preprint arXiv:2202.01862*, 2022.
- [64] A. Handa, A. Allshire, V. Makoviychuk, A. Petrenko, R. Singh, J. Liu, D. Makoviichuk, K. Van Wyk, A. Zhurkevich, B. Sundaralingam *et al.*, “Dextreme: Transfer of agile in-hand manipulation from simulation to reality,” *arXiv preprint arXiv:2210.13702*, 2022.
- [65] S. Nasiriany, T. Gao, A. Mandlekar, and Y. Zhu, “Learning and retrieval from prior data for skill-based imitation learning,” in *Conference on Robot Learning (CoRL)*, 2022.
- [66] O. Mees, L. Hermann, E. Rosete-Beas, and W. Burgard, “Calvin: A benchmark for language-conditioned policy learning for long-horizon robot manipulation tasks,” *IEEE Robotics and Automation Letters*, vol. 7, no. 3, pp. 7327–7334, 2022.
- [67] S. Levine, A. Kumar, G. Tucker, and J. Fu, “Offline reinforcement learning: Tutorial, review, and perspectives on open problems,” *arXiv preprint arXiv:2005.01643*, 2020.
- [68] O. Khatib, “A unified approach for motion and force control of robot manipulators: The operational space formulation,” *IEEE Journal on Robotics and Automation*, vol. 3, no. 1, pp. 43–53, 1987.
- [69] S. James, Z. Ma, D. R. Arrojo, and A. J. Davison, “Rlbench: The robot learning benchmark & learning environment,” *IEEE Robotics and Automation Letters*, vol. 5, no. 2, pp. 3019–3026, 2020.
- [70] S. Dasari, J. Wang, J. Hong, S. Bahl, Y. Lin, A. Wang, A. Thankaraj, K. Chahal, B. Calli, S. Gupta *et al.*, “Rb2: Robotic manipulation benchmarking with a twist,” *arXiv preprint arXiv:2203.08098*, 2022.
- [71] T. Yu, D. Quillen, Z. He, R. Julian, K. Hausman, C. Finn, and S. Levine, “Meta-world: A benchmark and evaluation for multi-task and meta reinforcement learning,” in *Conference on robot learning*. PMLR, 2020, pp. 1094–1100.
- [72] T. Mu, Z. Ling, F. Xiang, D. Yang, X. Li, S. Tao, Z. Huang, Z. Jia, and H. Su, “Maniskill: Generalizable manipulation skill benchmark with large-scale demonstrations,” *arXiv preprint arXiv:2107.14483*, 2021.
- [73] Y. Jiang, A. Gupta, Z. Zhang, G. Wang, Y. Dou, Y. Chen, L. Fei-Fei, A. Anandkumar, Y. Zhu, and L. Fan, “Vima: General robot manipulation with multimodal prompts,” *arXiv preprint arXiv:2210.03094*, 2022.
- [74] C. Chamzas, C. Quintero-Pena, Z. Kingston, A. Orthey, D. Rakita, M. Gleicher, M. Toussaint, and L. E. Kavraki, “Motionbenchmaker: A tool to generate and benchmark motion planning datasets,” *IEEE Robotics and Automation Letters*, vol. 7, no. 2, pp. 882–889, 2021.
- [75] C. Lynch, M. Khansari, T. Xiao, V. Kumar, J. Tompson, S. Levine, and P. Sermanet, “Learning latent plans from play,” in *Conference on Robot Learning*, 2019.
- [76] K. Pertsch, Y. Lee, Y. Wu, and J. J. Lim, “Demonstration-guided reinforcement learning with learned skills,” in *Conference on Robot Learning*, 2021.
- [77] A. Ajay, A. Kumar, P. Agrawal, S. Levine, and O. Nachum, “Opal: Offline primitive discovery for accelerating offline reinforcement learning,” in *International Conference on Learning Representations*, 2021.
- [78] K. Hakhamaneshi, R. Zhao, A. Zhan, P. Abbeel, and M. Laskin, “Hierarchical few-shot imitation with skill transition models,” in *International Conference on Learning Representations*, 2021.

- [79] A. Kumar, A. Singh, F. Ebert, Y. Yang, C. Finn, and S. Levine, “Pre-training for robots: Offline rl enables learning new tasks from a handful of trials,” *arXiv preprint arXiv:2210.05178*, 2022.
- [80] M. A. Fischler and R. C. Bolles, “Random sample consensus: a paradigm for model fitting with applications to image analysis and automated cartography,” *Communications of the ACM*, vol. 24, no. 6, pp. 381–395, 1981.
- [81] M. Ester, H.-P. Kriegel, J. Sander, X. Xu *et al.*, “A density-based algorithm for discovering clusters in large spatial databases with noise,” in *kdd*, vol. 96, no. 34, 1996, pp. 226–231.
- [82] K. He, G. Gkioxari, P. Dollár, and R. Girshick, “Mask r-cnn,” in *Proceedings of the IEEE international conference on computer vision*, 2017, pp. 2961–2969.
- [83] M. Danielczuk, M. Matl, S. Gupta, A. Li, A. Lee, J. Mahler, and K. Goldberg, “Segmenting unknown 3d objects from real depth images using mask r-cnn trained on synthetic data,” in *2019 International Conference on Robotics and Automation (ICRA)*. IEEE, 2019, pp. 7283–7290.
- [84] B. Wen, C. Mitash, S. Soorian, A. Kimmel, A. Sintov, and K. E. Bekris, “Robust, occlusion-aware pose estimation for objects grasped by adaptive hands,” in *2020 IEEE International Conference on Robotics and Automation (ICRA)*. IEEE, 2020, pp. 6210–6217.
- [85] Z. Zhang, “Iterative point matching for registration of free-form curves and surfaces,” *International journal of computer vision*, vol. 13, no. 2, pp. 119–152, 1994.
- [86] Y. Liu, Y. Wen, S. Peng, C. Lin, X. Long, T. Komura, and W. Wang, “Gen6d: Generalizable model-free 6-dof object pose estimation from rgb images,” in *Computer Vision—ECCV 2022: 17th European Conference, Tel Aviv, Israel, October 23–27, 2022, Proceedings, Part XXXII*. Springer, 2022, pp. 298–315.
- [87] J. Sun, Z. Wang, S. Zhang, X. He, H. Zhao, G. Zhang, and X. Zhou, “Onepose: One-shot object pose estimation without cad models,” in *Proceedings of the IEEE/CVF Conference on Computer Vision and Pattern Recognition*, 2022, pp. 6825–6834.
- [88] B. Wen, J. Tremblay, V. Blukis, S. Tyree, T. Muller, A. Evans, D. Fox, J. Kautz, and S. Birchfield, “Bundlesdf: Neural 6-dof tracking and 3d reconstruction of unknown objects,” *CVPR*, 2023.
- [89] Y. Zhu, Z. Wang, J. Merel, A. Rusu, T. Erez, S. Cabi, S. Tunyasuvunakool, J. Kramár, R. Hadsell, N. de Freitas *et al.*, “Reinforcement and imitation learning for diverse visuomotor skills,” *arXiv preprint arXiv:1802.09564*, 2018.
- [90] A. Mandlekar, F. Ramos, B. Boots, S. Savarese, L. Fei-Fei, A. Garg, and D. Fox, “Iris: Implicit reinforcement without interaction at scale for learning control from offline robot manipulation data,” in *IEEE International Conference on Robotics and Automation (ICRA)*. IEEE, 2020, pp. 4414–4420.
- [91] L. Chen, R. Paleja, and M. Gombolay, “Learning from suboptimal demonstration via self-supervised reward regression,” in *Conference on robot learning*. PMLR, 2021, pp. 1262–1277.
- [92] D. Brown, W. Goo, P. Nagarajan, and S. Niekum, “Extrapolating beyond suboptimal demonstrations via inverse reinforcement learning from observations,” in *International conference on machine learning*. PMLR, 2019, pp. 783–792.
- [93] R. Jeong, J. T. Springenberg, J. Kay, D. Zheng, Y. Zhou, A. Galashov, N. Heess, and F. Nori, “Learning dexterous manipulation from suboptimal experts,” *arXiv preprint arXiv:2010.08587*, 2020.
- [94] H. Xu, X. Zhan, H. Yin, and H. Qin, “Discriminator-weighted offline imitation learning from suboptimal demonstrations,” in *International Conference on Machine Learning*. PMLR, 2022, pp. 24 725–24 742.
- [95] M. Yang, S. Levine, and O. Nachum, “Trail: Near-optimal imitation learning with suboptimal data,” *arXiv preprint arXiv:2110.14770*, 2021.
- [96] A. S. Morgan, B. Wen, J. Liang, A. Boularias, A. M. Dollar, and K. Bekris, “Vision-driven compliant manipulation for reliable, high-precision assembly tasks,” *RSS*, 2021.
